# Supplementary material for: Modeling Congenital Adrenal Hyperplasia and Testing Interventions for Adrenal Insufficiency Using Donor-Specific Reprogrammed Cells
Source: PubMed Central journal article supplement (PMC5809617; doi:10.1016/j.celrep.2018.01.003), 2018-01-30
Supplement: mmc1.pdf [file mmc1.pdf]

**Supplemental Information**

**Modeling Congenital Adrenal Hyperplasia  
and Testing Interventions for Adrenal Insufficiency  
Using Donor-Specific Reprogrammed Cells**

**Gerard Ruiz-Babot, Mariya Balyura, Irene Hadjidemetriou, Sharon J. Ajodha, David R. Taylor, Lea Ghataore, Norman F. Taylor, Undine Schubert, Christian G. Ziegler, Helen L. Storr, Maralyn R. Druce, Evelien F. Gevers, William M. Drake, Umasuthan Srirangalingam, Gerard S. Conway, Peter J. King, Louise A. Metherell, Stefan R. Bornstein, and Leonardo Guasti**

Figure S1 (related to Figure 1)

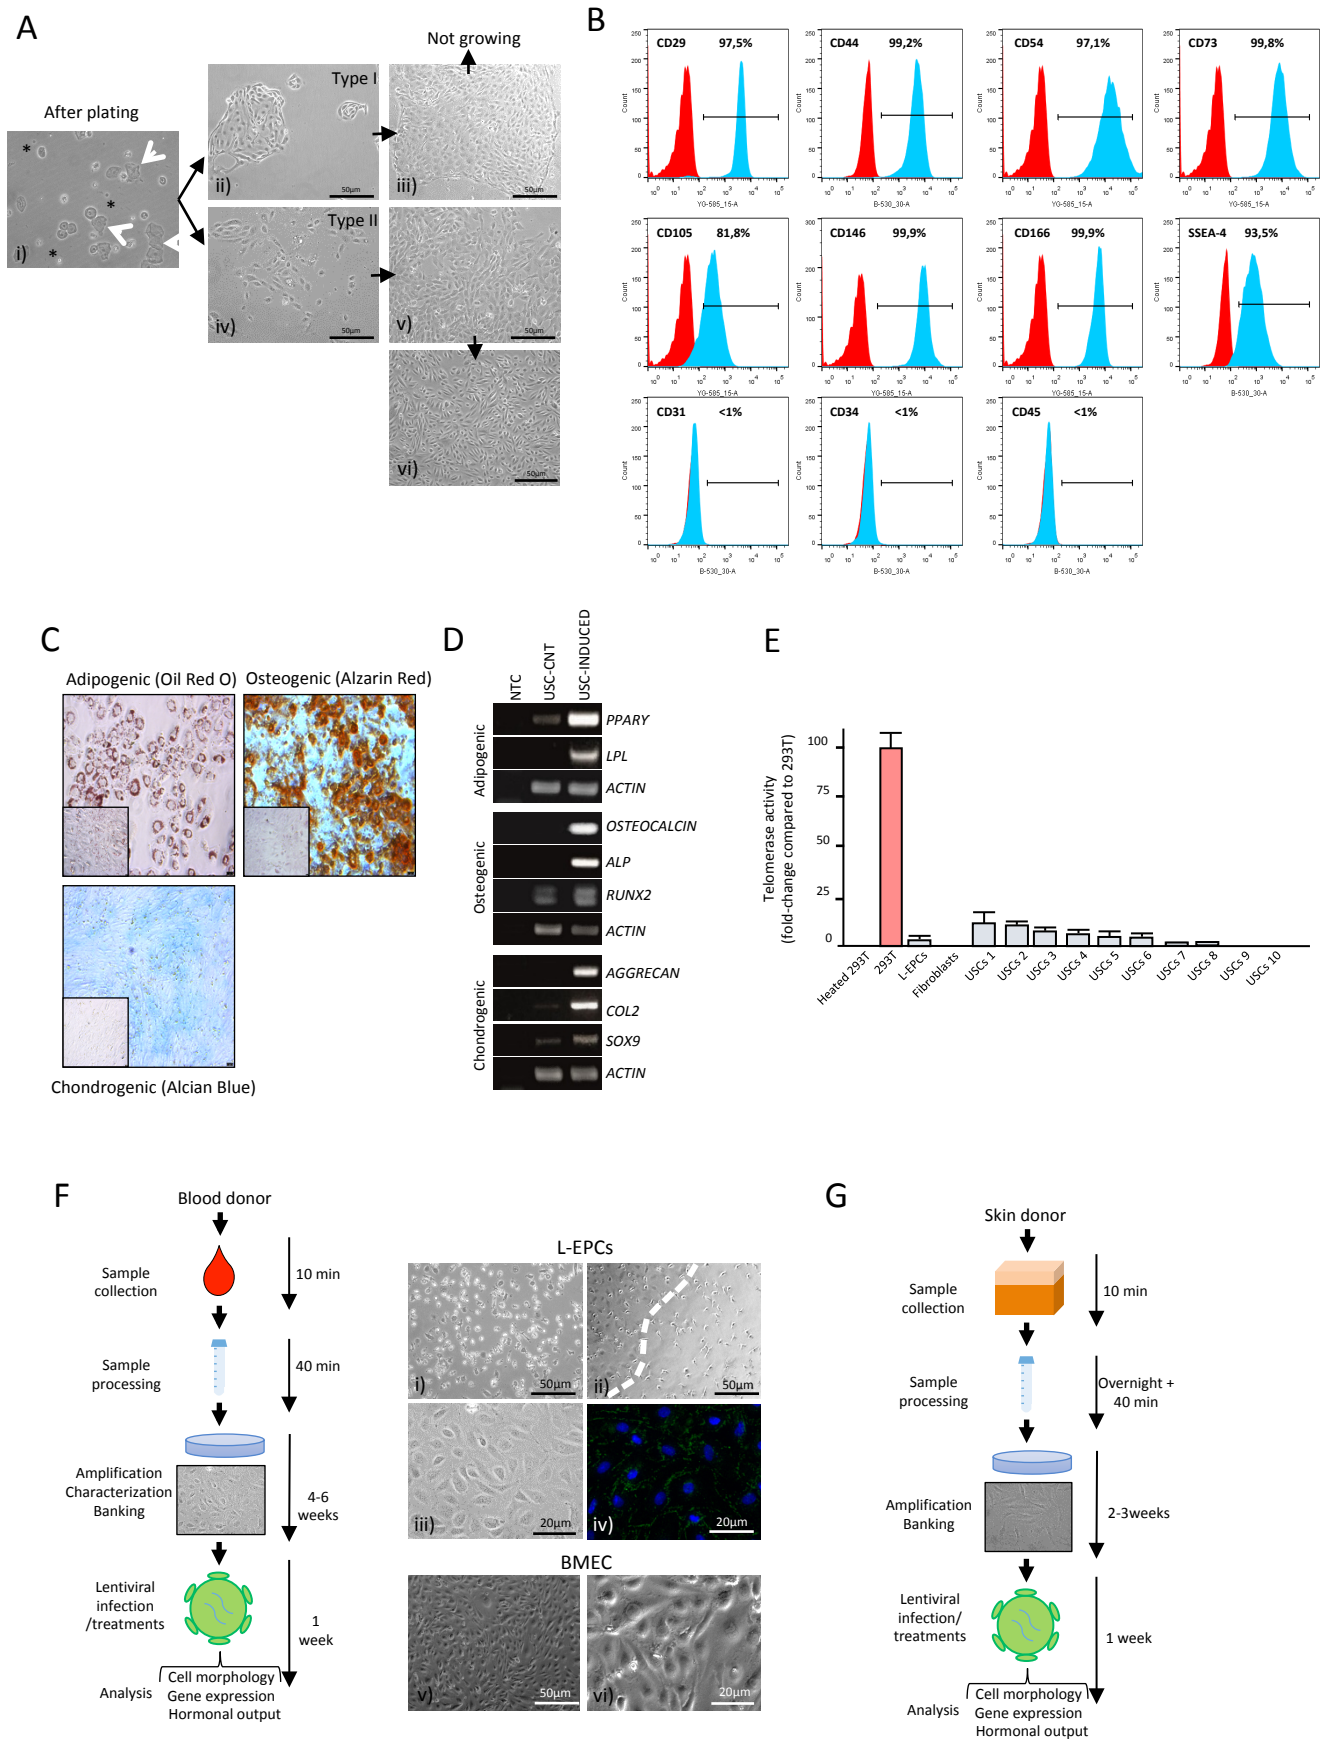

**Figure Suppl. 1. Establishment and characterization of human primary cells from donors.**

**A)** Isolation of urine-derived stem cells (USCs). Two main urine-derived cell populations generated large colonies within a few days in culture: colonies with defined edges, which were proliferation-arrested past passage 1 (named type-I colonies), and those characterized by cells with a rice-grain morphology, which were viable for several passages and were bankable (named type-II colonies, representing USCs<sup>1</sup>). **i)** Cells after plating. Arrows indicate squamous cells and asterisks blood cells. **ii-iii)** Morphology of a type-I colony. **iv-v)** Morphology of a type-II colony (USCs). **vi)** Type-II colony at confluency showing the typical rice-grain morphology. Scale bars = 50  $\mu\text{m}$ . **B)** The expression of cell surface marker in USCs at passage 2 was assessed by flow cytometry. USCs expressed mesenchymal (CD29, CD44, CD54, CD73, CD105, CD146, CD166), pluripotent (SSEA-4), but not hematopoietic (CD31, CD34, CD45) stem cell markers. The peaks in red represent the signal relative to the isotype controls and those in light blue the CD specific signal. **C)** USCs had the potential to differentiate to adipogenic, chondrogenic and osteogenic lineages using specific induction media. Confluent USCs were treated with adipogenic, chondrogenic and osteogenic media for 21 days and then stained with Oil Red O, Alcian Blue and Alizarin Red, respectively. Parallel cultures from the same non-induced colony are shown in the insets. **D)** RT-PCR expression analyses of osteogenic, adipogenic, and chondrogenic lineage markers. *PPARG*, peroxisome proliferator-activated receptor gamma; *LPL*, lipoprotein lipase; *ALP*, alkaline phosphatase; *RUNX2*, runt-related transcription factor 2; *COL2*, collagen 2; *SOX9*, Sry-related HMG box-9. **E)** Measurement of telomerase activity. Eight out of ten individual USC clones expressed detectable levels of telomerase. **F)** Schematic illustrating our strategy for blood collection, processing and reprogramming. L-EPC colonies displayed the characteristic cobblestone morphology<sup>2</sup> and appeared after 3-5 weeks of culturing mononuclear cells. **i)** Mononuclear cells after plating. **ii)** Edge of a L-EPCs with single mononuclear cells around. **iii)** L-EPCs at confluency. **iv)** L-EPCs grew as highly proliferating and tightly attached cells expressing Zona Occludens-1. **v** and **vii)** Bone marrow-derived endothelial cells, BMEC<sup>3,4</sup>. Scale bars i, ii and v = 50  $\mu\text{m}$ ; iii, iv and vi = 20  $\mu\text{m}$ . **G)** Schematic illustrating our strategy for skin collection, processing and reprogramming of fibroblasts. Data in **E** are represented as mean  $\pm$  SEM.

Figure S2 (related to Figure 1)

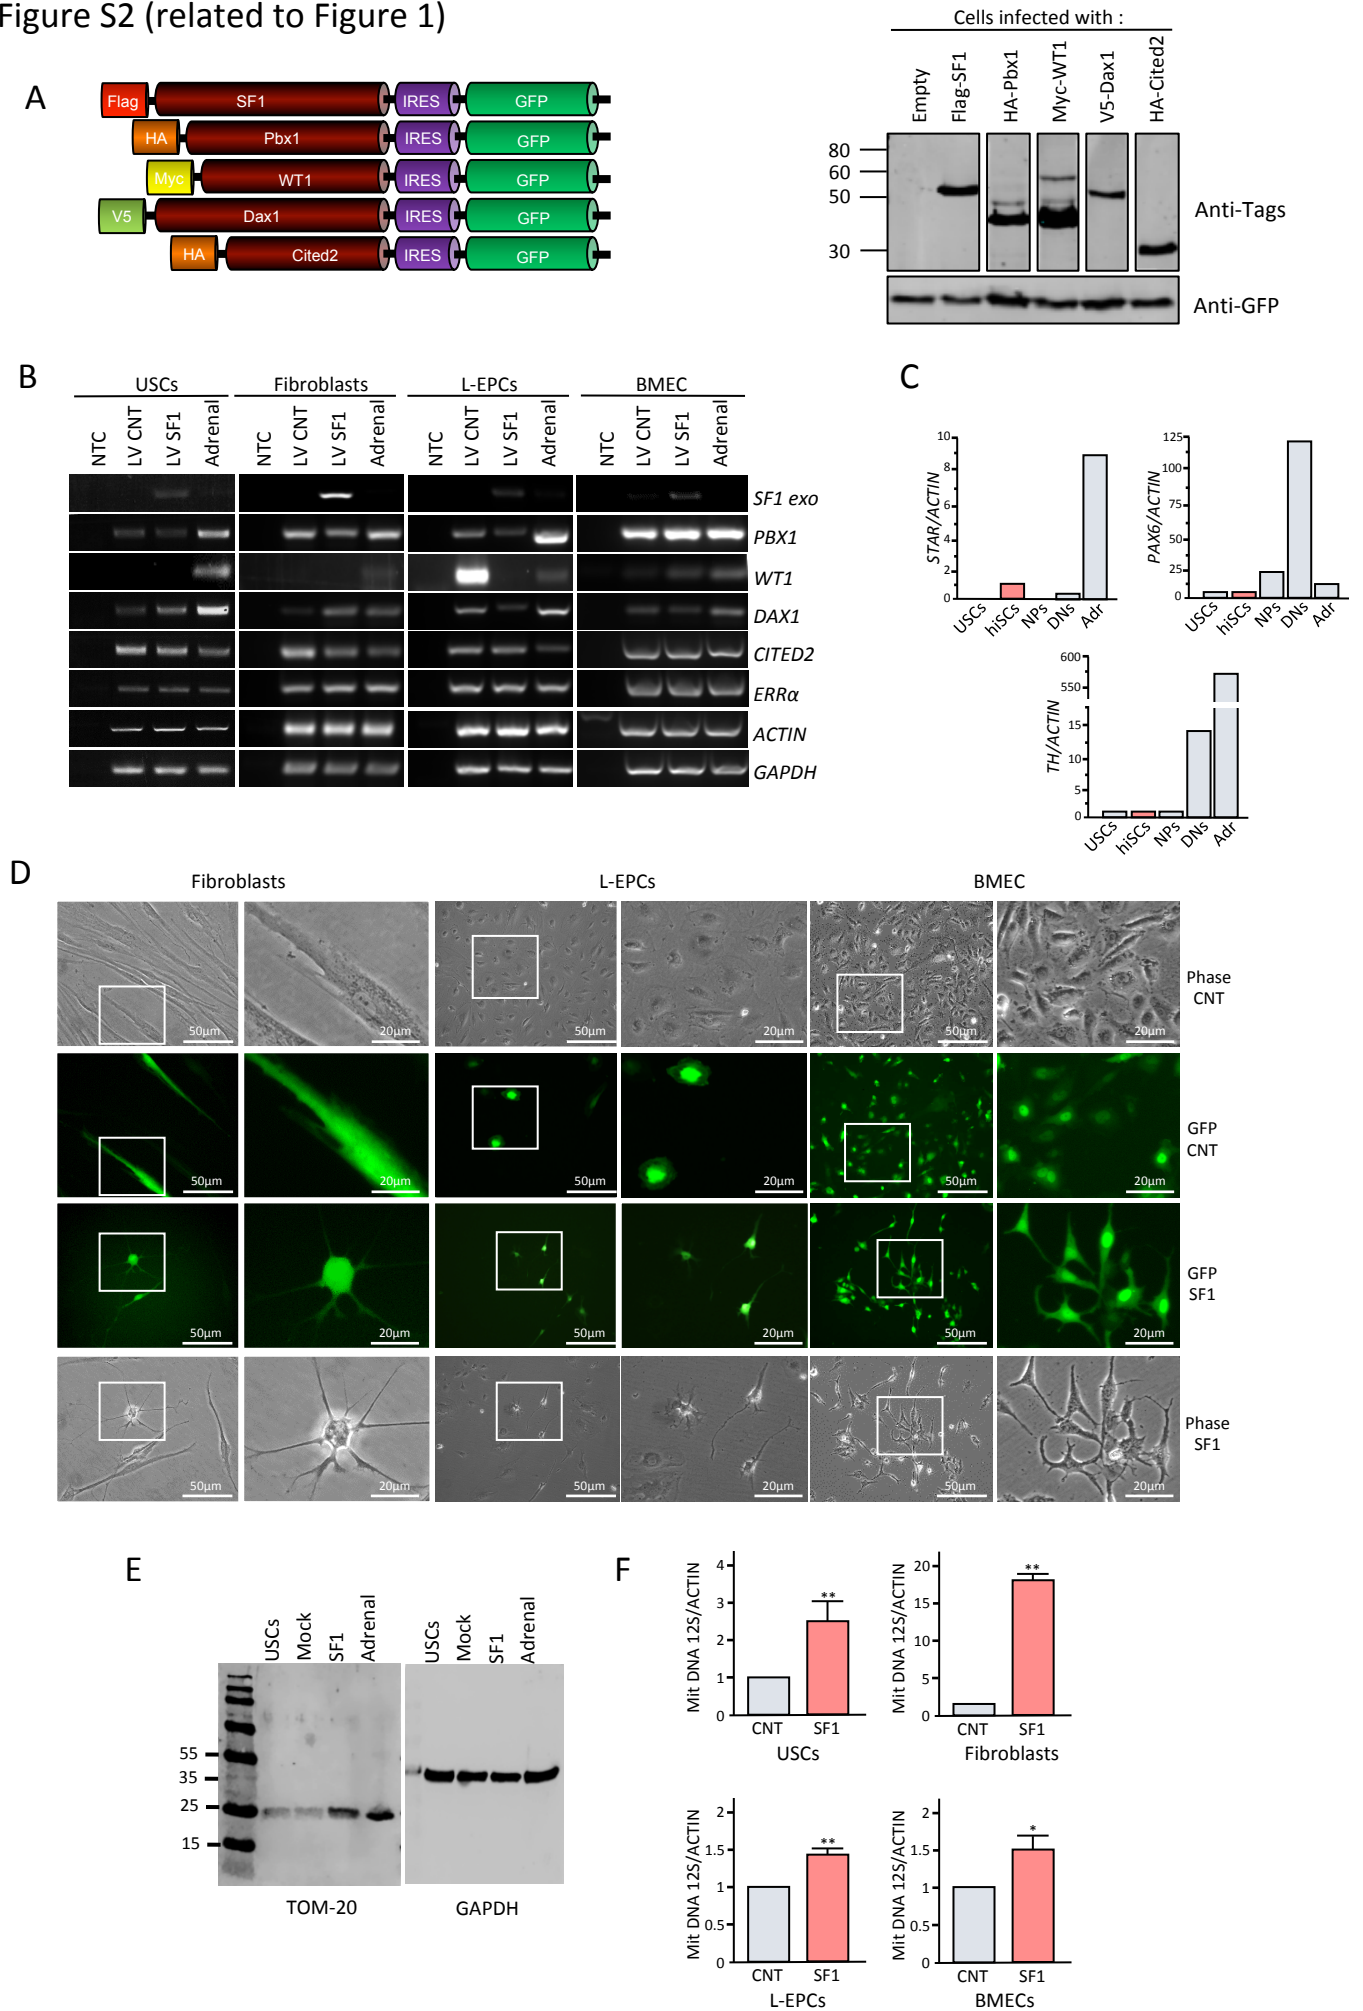



**Figure Suppl. 2. Reprogramming, morphologic changes and gene expression in human cells.**

**A)** Schematic representation of the lentiviral vectors used to force the expression of tagged transcription factors Flag-SF1, HA-PBX1, Myc-WT1, V5-DAX1 and HA-CITED2. Their expression in infected cells was assessed by western blot using anti-tag antibodies, and by using anti-GFP antibody as a loading control (right panels). **B)** Expression of exogenous *SF1* and endogenous *PBX1*, *WT1*, *DAX1*, *CITED2*, *ERRa*, *ACTIN* and *GAPDH* in reprogrammed (SF1), mock-reprogrammed (CNT) USCs, fibroblasts, L-EPCs, BMEC and human adrenal. NTC, no template control. **C)** RT-qPCR analyses of *STAR*, *PAX6* and *TH* expression in USCs, USC-hiSCs (8 days differentiation), neuronal precursors (NPs), neurons differentiated *in vitro* from NPs for 12 days (DNs) and human adrenal. **D)** Morphological changes upon SF1 overexpression and br-cAMP treatment in fibroblasts, L-EPCs and BMEC 8 days post-infection. Scale bars = 50  $\mu\text{m}$ , for inset = 20  $\mu\text{m}$ . **E)** Expression of TOM20 protein in control and reprogrammed cells. **F)** Expression of mitochondrial DNA 12S in control and reprogrammed cells. Data in F are represented as mean  $\pm$  SEM.

Figure S3 (related to Figure 2)

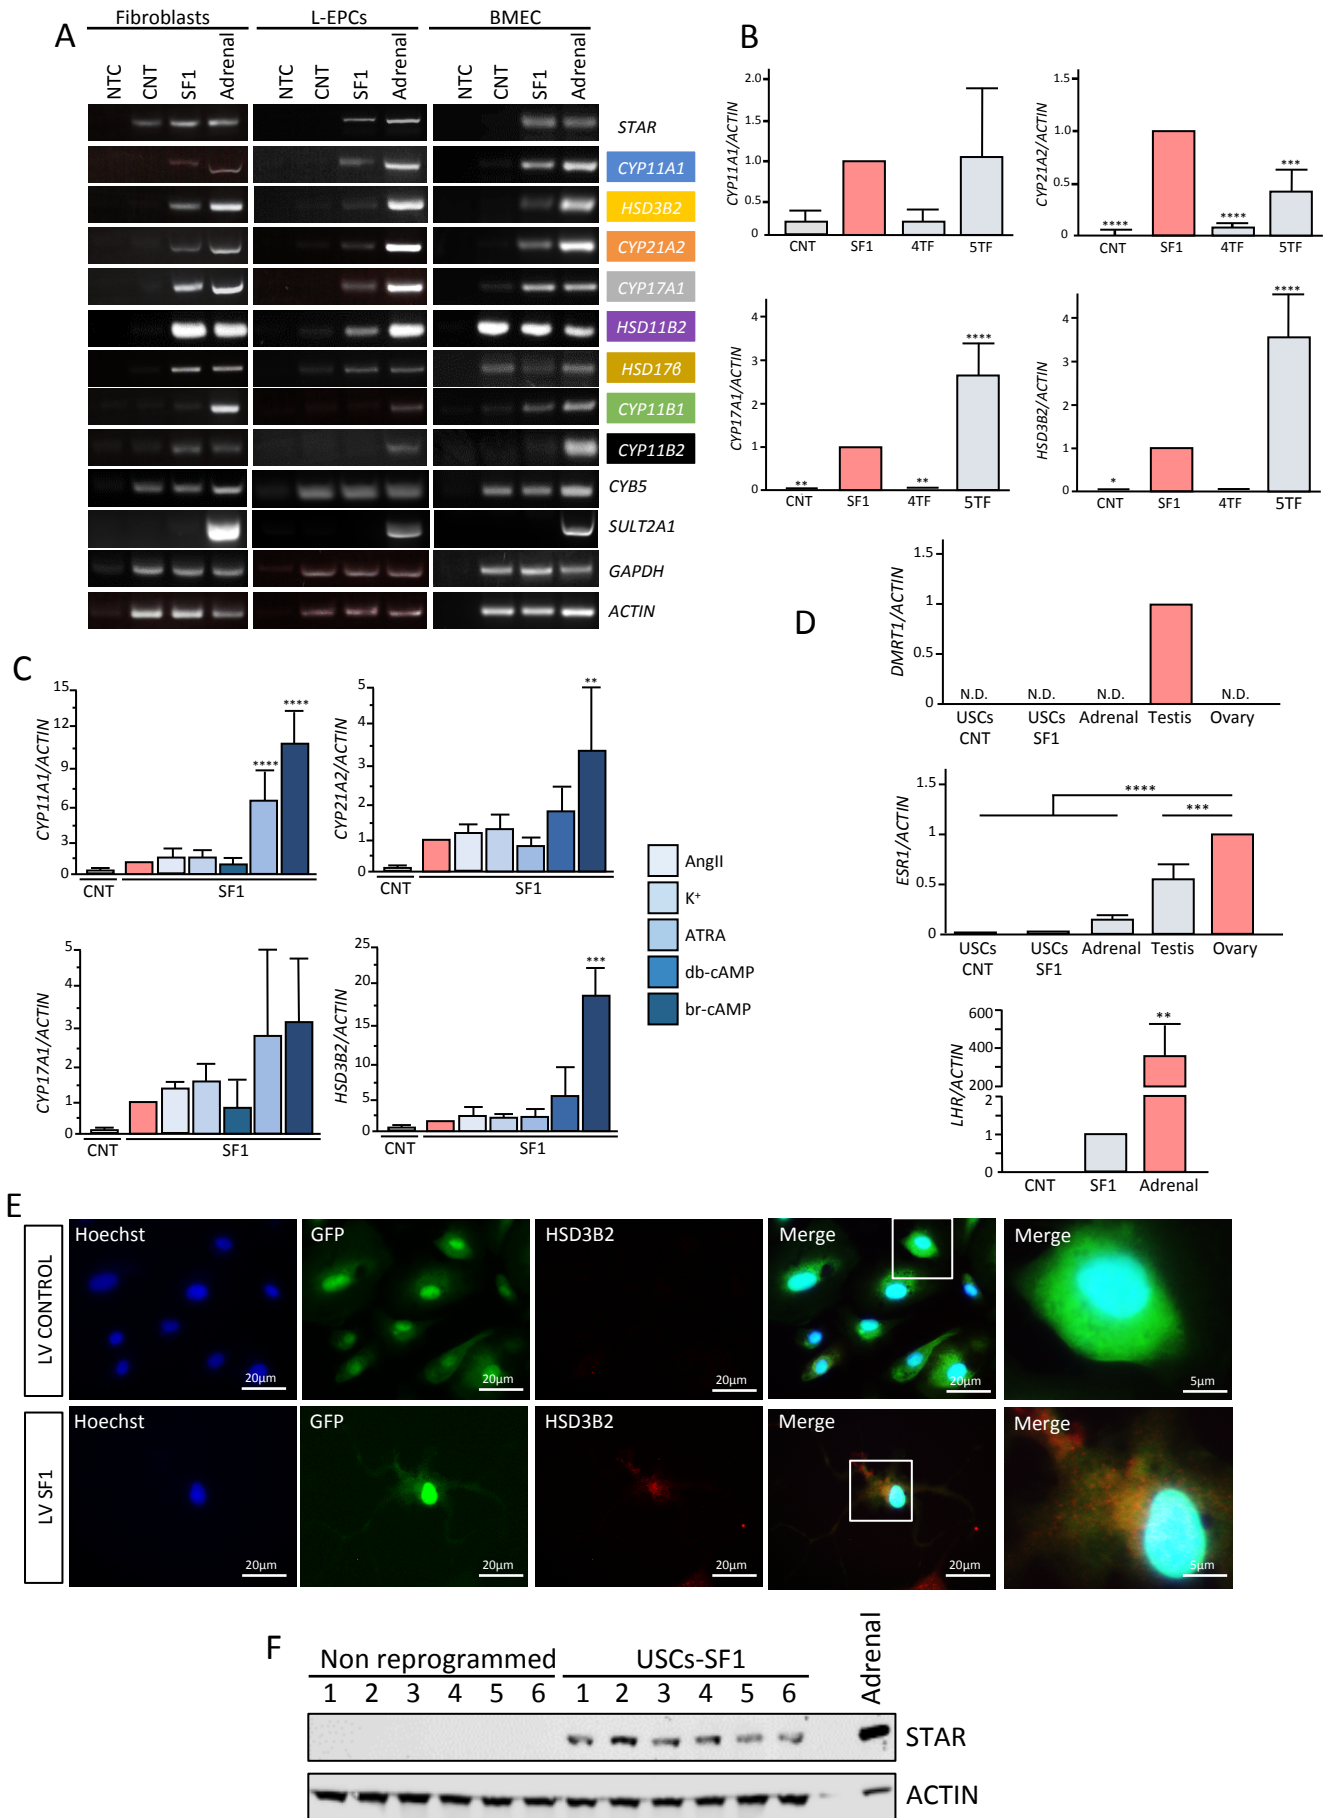

**Figure Suppl. 3. Reprogramming and gene expression in human cells.**

**A)** RT-PCR expression analyses of *STAR*, steroidogenic enzymes, *SULT2A1*, *GAPDH* and *ACTIN* in cells infected with SF1 or control (CNT) lentiviruses after 8 days. Human adrenal cDNA was used as a positive control. All cells were treated with br-cAMP. NTC, no template control, Adr, human adrenal. **B)** RT-qPCR analyses of the expression of *CYP11A1*, *CYP21A2*, *CYP17A1* and *HSD3B2* in cells infected with control lentivirus, lentivirus encoding SF1, 4TF (PBX1, WT1, DAX1 and CITED2) and 5 TF (4TF+SF1). **C)** RT-qPCR analyses of the expression of *CYP11A1*, *CYP21A2*, *CYP17A1* and *HSD3B2* in cells infected with control lentivirus and lentivirus encoding SF1, followed by treatments with AngII, KCl, ATRA, db-cAMP and br-cAMP for 8 days. **D)** RT-qPCR analyses of the expression of *DMRT1* (top panel), *ESR1* (middle panel) in cells infected with control lentivirus, lentivirus encoding SF1, as well as in human adrenal, testes and ovary. The bottom panel shows RT-qPCR analyses of the expression of *LHR* in cells infected with control lentivirus, lentivirus encoding SF1, and in human adrenal. **E)** HSD3B2 immunocytochemistry in control USCs and USCs infected with SF1 after 8 days *in vitro*. Scale bars = 20  $\mu\text{m}$ , for inset = 5  $\mu\text{m}$  **F)** Western blot analyses of STAR protein levels in 6 independent donors 8 days after reprogramming. Data in **B**, **C** and **D** are represented as mean  $\pm$  SEM.

Figure S4 (related to Figure 3)

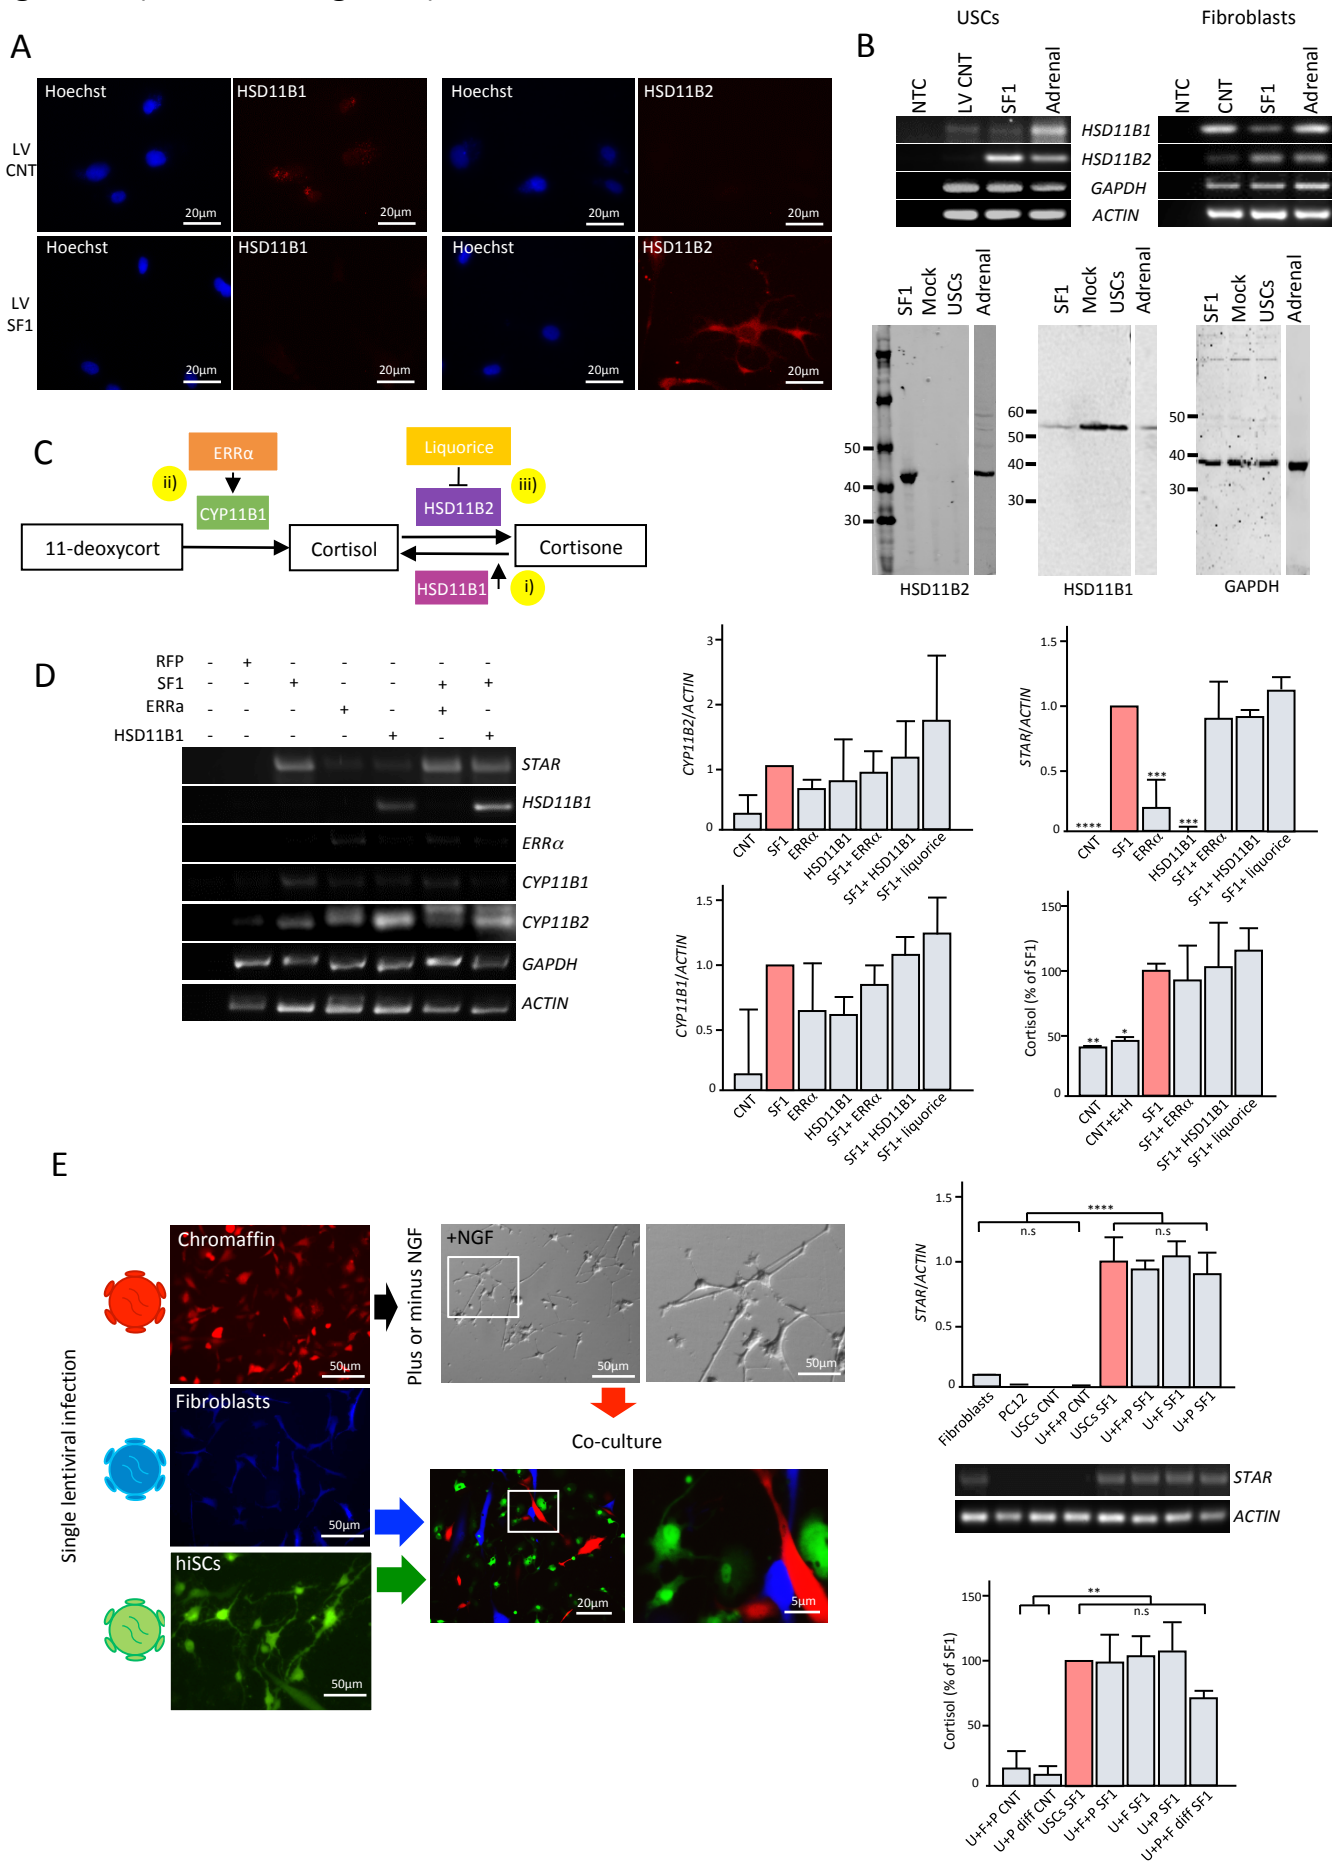

**Figure Suppl. 4. Modulation of steroidogenic pathways involved in cortisol production.**

The low cortisol/cortisone ratio observed in hiSCs could be due to an enhanced expression of the enzyme hydroxysteroid 11- $\beta$  dehydrogenase 2 (HSD11B2), responsible for the conversion of cortisol to cortisone, or a downregulation of hydroxysteroid 11- $\beta$  dehydrogenase 1 (HSD11B1), which catalyzes the reverse reaction in hiSCs compared to controls. **A)** Immunocytochemistry of HSD11B1 and HSD11B2 in control and SF1-infected cells 8 days post-infection. Scale bars = 20  $\mu$ m. **B)** HSD11B1 and HSD11B2 gene (upper panels) and protein (lower panel) expression in in control and SF1-infected cells 8 days post-infection. Human adrenal cDNA and lysate were used as positive controls for RT-PCR and western blot, respectively. Overall, data from **A** and **B** showed a strong upregulation of HSD11B2 and a downregulation of HSD11B1 at the mRNA and protein levels. **C)** Schematic of strategies tested to revert the low cortisol/cortisone ratio in reprogrammed cells: i) forced-expression of HSD11B1, ii) forced-expression of Estrogen-related receptor alpha (ERR $\alpha$ ), a TF known to increase CYP11B1 levels<sup>5</sup>; iii) inhibition of HSD11B2 with liquorice, a compound extracted from the root of the plant *Glycyrrhiza glabra*<sup>6</sup>. Moreover, co-cultures of hiSCs with fibroblasts and differentiated chromaffin cells were established, as data support the idea that chromaffin cells increase basal steroidogenic activity when co-cultured with adrenocortical cells<sup>7</sup>. **D)** RT-qPCR analyses of *STAR*, *CYP11B1* and *CYP11B2* expression levels, as well as cortisol measurements in urine-derived hiSCs overexpressing various combinations of SF1, HSD11B1 and ERR $\alpha$  or treated with liquorice for 8 days. **E)** mCherry-expressing PC12 cells were differentiated with nerve growth factor (NGF) and co-cultured with blue fluorescent protein-expressing human fibroblasts and GFP-expressing hiSCs (1:1:1 ratio) for 8 days before RT-PCR and RT-qPCR analyses of *STAR* expression and cortisol measurements. U, USC; F, fibroblasts; P, PC12 chromaffin cells with (Diff.) or without NGF pre-treatment. Scale bars, left panels = 50  $\mu$ m; bright field panel = 50  $\mu$ m, inset = 20  $\mu$ m; bottom right panel = 20  $\mu$ m, inset = 5  $\mu$ m. Data are represented as mean  $\pm$  SEM.

Figure S5  
(related to  
Figure 4)

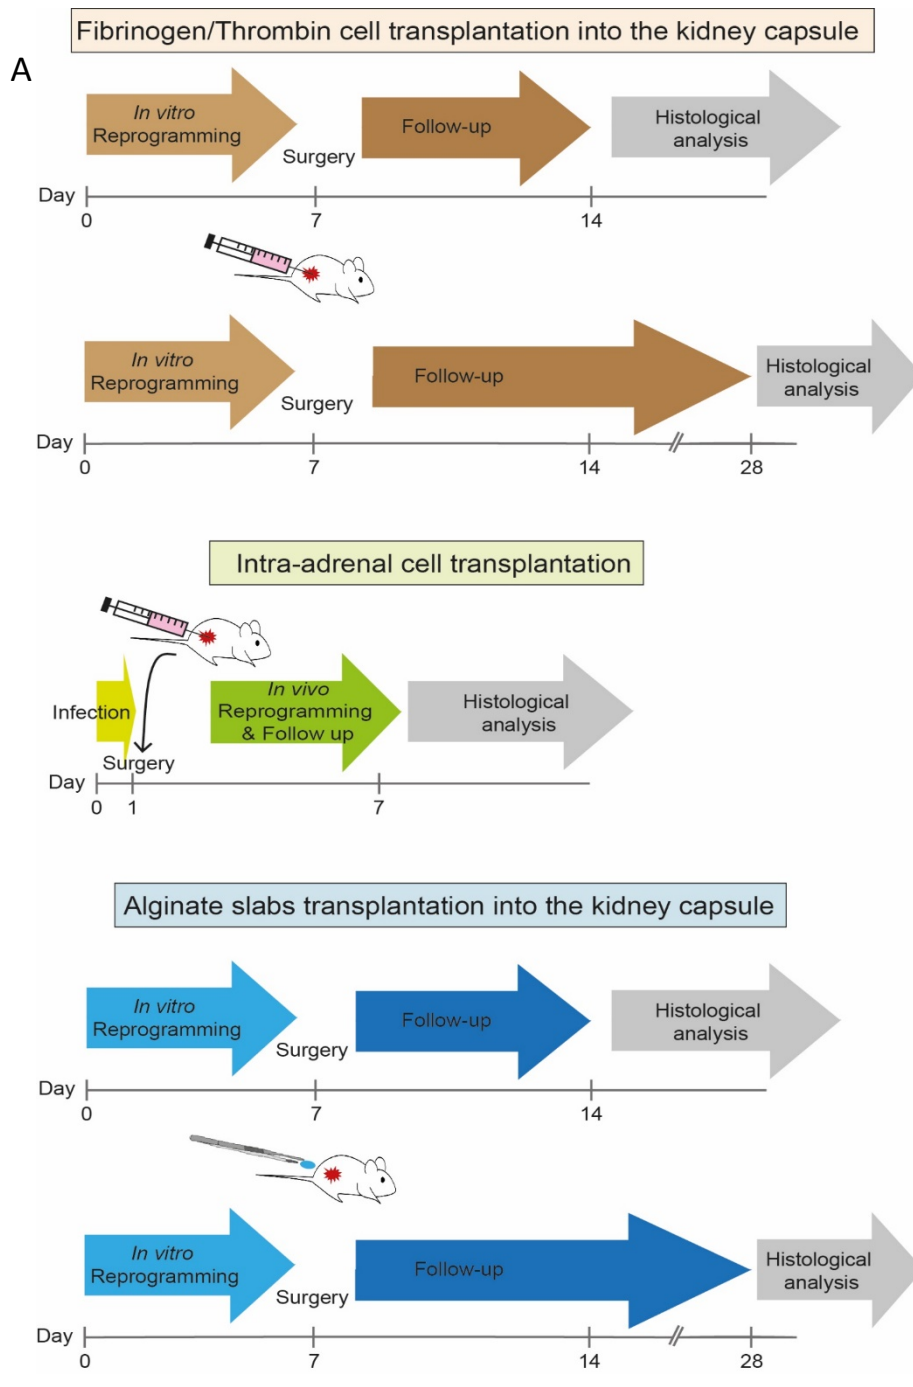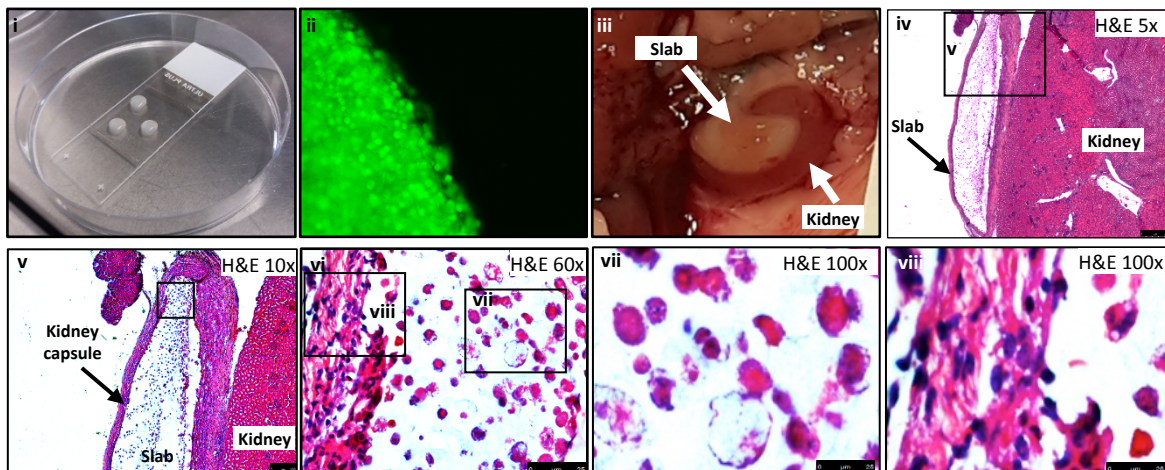

**Figure Suppl. 5. A)** Schematics of the *in vivo* transplantation experiments. Alginate slabs were implanted into C57BL/6 mice, while SCID mice were used for cells implanted into the kidney capsule and intra-adrenal. **B)** i) An example of alginate preparation with  $1 \cdot 10^6$  hiSCs cells embedded within each slab; ii) An alginate slab containing GFP-positive hiSCs observed under fluorescence microscopy; iii) An alginate slab implanted under the kidney capsule; iii-viii) H&E analyses of alginate slabs sections after 1 week, with vi-vii showing histological features of cell death, not observed in adjacent structures such as the kidney capsule (viii). Scale bars: d = 500  $\mu\text{m}$ ; e = 100  $\mu\text{m}$ ; vi-viii = 25  $\mu\text{m}$ .



Figure S6  
(related to  
Figure 4)

**A**

| Gene  | Protein  | Fold change | p-Val                 | Uniprot-Entry |
|-------|----------|-------------|-----------------------|---------------|
| CD9   | CD9      | 2.6         | 1.8x10 <sup>-14</sup> | P21926        |
| IF2B3 | IGF2BP3  | 2.04        | 2.3x10 <sup>-11</sup> | O00425        |
| SC16A | SEC16A   | 1.95        | 2.0x10 <sup>-10</sup> | O15027        |
| TNR21 | TNFRSF21 | 1.59        | 1.7x10 <sup>-06</sup> |               |
| SYSC  | SARS     | 1.59        | 1.2x10 <sup>-05</sup> | P49591        |
| UN93B | UNC93B1  | 1.57        | 1.8x10 <sup>-06</sup> | Q9H1C4        |
| DKK3  | DKK3     | 1.51        | 1.1x10 <sup>-07</sup> | Q0UBP4        |
| NUB1  | NUB1     | 1.49        | 2.7x10 <sup>-07</sup> | Q9Y5A7        |
| PO5F1 | Oct4     | 1.49        | 4.5x10 <sup>-05</sup> | Q01860        |
| SPR2A | SPRR2A   | 1.47        | 1.0x10 <sup>-07</sup> | P35326        |
| CTGF  | CTGF     | 1.46        | 2.0x10 <sup>-06</sup> | P29279        |
| CXB1  | GJB1     | 1.46        | 6.1x10 <sup>-08</sup> | P08034        |
| TRI22 | TRIM22   | 1.44        | 1.1x10 <sup>-05</sup> | Q81YM9        |
| NAP1  | C9orf156 | 1.43        | 6.7x10 <sup>-06</sup> | Q9BU70        |
| NCOR2 | NCOR2    | 1.42        | 1.2x10 <sup>-07</sup> | Q9Y618        |
| LTOR1 | LAMTOR1  | 1.42        | 1.6x10 <sup>-05</sup> | Q6IAA8        |
| UBE2T | UBE2T    | 0.69        | 1.9x10 <sup>-05</sup> | Q9NPD8        |
| EGNL  | EGNL     | 0.67        | 1.3x10 <sup>-06</sup> | P17813        |

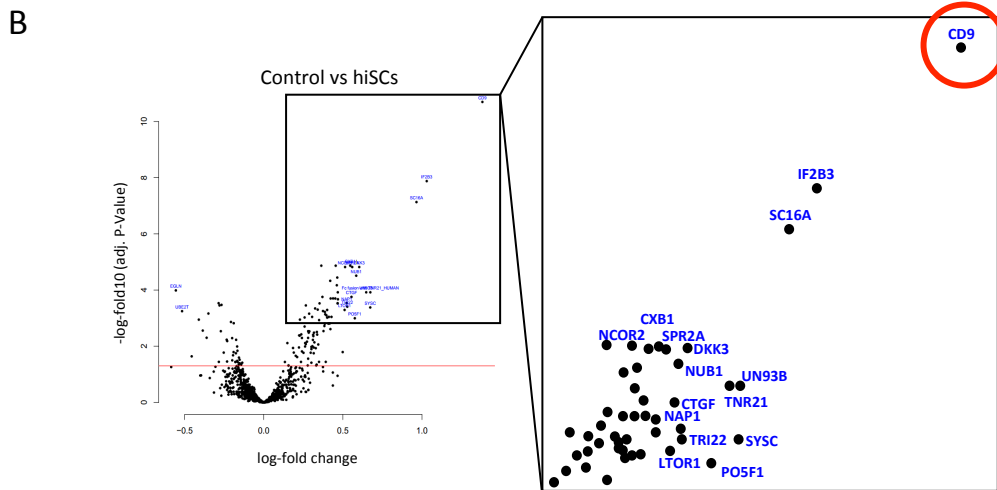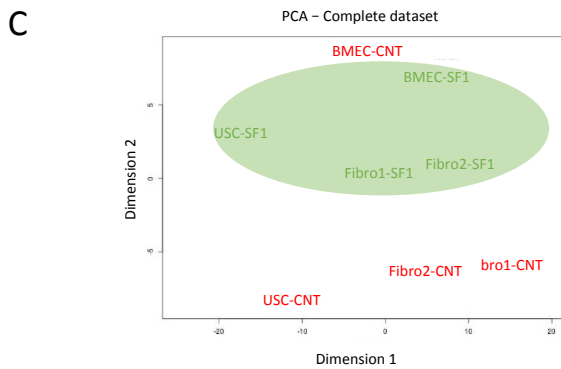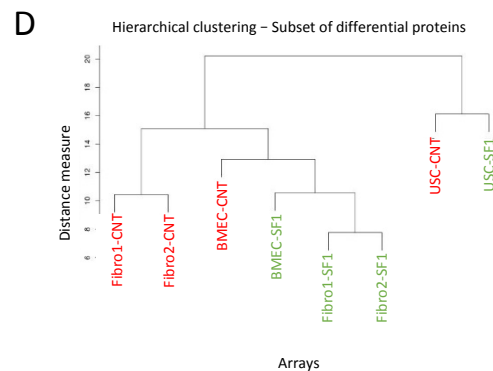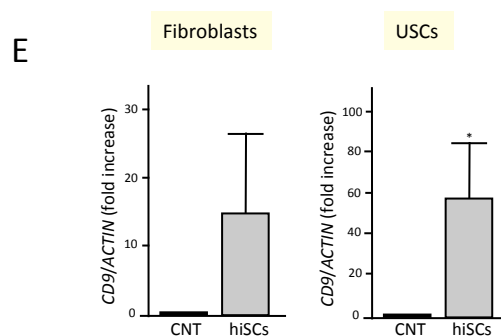

**Figure Suppl. 6. Protein array of hiSC vs mock-reprogrammed cells.**

**A)** Proteins with differential abundance in hiSCs and control cells. Proteins with a positive logFC value had a higher abundance in hiSCs, proteins with a negative value in control cells. Fold change, p values and Uniprot Identifiers are listed. **B)** Volcano plot representation showing the p values (adjusted for multiple testing) and corresponding log-fold changes. A significance level of adj. p = 0.05 is indicated as a horizontal line. The protein profiling of different human hiSCs showed upregulation of those involved in pathways controlling cellular reprogramming such as protein transport and synthesis (IF2B3, SC16A, SYSC), cytoskeletal remodelling regulators (CD9, NUB1), embryonic reprogramming factors (DKK3, PO5F1), transcriptional regulators and chromatin remodelling proteins (NAP1, NCOR2). Interestingly, we detected a significant upregulation in hiSCs of LTOR1, a protein involved in cholesterol homeostasis. **C)** Principal-Component-Analyses (PCA) of the protein samples based on complete array data. **D)** Hierarchical clustering of the samples using complete array data. **E)** RT-qPCR validation of *CD9* up-regulation in USCs and fibroblasts before (control) and after (hiSC) reprogramming. Fold increase of *CD9* normalized by *ACTIN* levels. Data in **E** are represented as mean  $\pm$  SEM.

## Bibliography

1. Zhou, T. *et al.* Generation of human induced pluripotent stem cells from urine samples. *Nat Protoc* **7**, 2080–2089 (2012).
2. Geti, I. *et al.* A Practical and Efficient Cellular Substrate for the Generation of Induced Pluripotent Stem Cells from Adults: Blood-Derived Endothelial Progenitor Cells. *Stem Cells Transl. Med.* **1**, 855–865 (2012).
3. Schweitzer, K. M. *et al.* Characterization of a newly established human bone marrow endothelial cell line: distinct adhesive properties for hematopoietic progenitors compared with human umbilical vein endothelial cells. *Lab. Invest.* **76**, 25–36 (1997).
4. Solito, E., Romero, I. A., Marullo, S., Russo-Marie, F. & Weksler, B. B. Annexin 1 Binds to U937 Monocytic Cells and Inhibits Their Adhesion to Microvascular Endothelium: Involvement of the  $\alpha 4\beta 1$  Integrin. *J. Immunol.* **165**, (2000).
5. Li-Chuan Chenga, Tun-Wen Paib, L.-A. L. Regulation of human CYP11B1 and CYP11B2 promoters by transposable elements and conserved cis elements. *Steroids* **77**, 100–109 (2010).
6. Hammer, F. & Stewart, P. M. Cortisol metabolism in hypertension. *Best Pract. Res. Clin. Endocrinol. Metab.* **20**, 337–353 (2006).
7. Haidan, A. *et al.* Basal Steroidogenic Activity of Adrenocortical Cells Is Increased 10-Fold by Coculture with Chromaffin Cells <sup>1</sup>. *Endocrinology* **139**, 772–780 (1998).

## Supplemental experimental procedures

### Materials

#### Antibodies

| Antibody                                    | Host              | Company                                    | Code      | Dilution       | Application |
|---------------------------------------------|-------------------|--------------------------------------------|-----------|----------------|-------------|
| StAR                                        | Mouse             | Abcam                                      | Ab58013   | 1:2.000, 1:200 | WB, IHC     |
| SF1                                         | Mouse             | Invitrogen                                 | 434200    | 1:2.000        | WB          |
| HSD11B1                                     | Rabbit            | Abcam                                      | Ab39364   | 1:2.000        | WB, IF      |
| HSD11B2                                     | Mouse             | Santa Cruz                                 | Sc365529  | 1:2.000        | WB, IF      |
| HSD3B2                                      | Rabbit            | Avivasysbio                                | QC14296   | 1:2.000        | WB          |
| CYP11A1 (D8F4F)                             | Rabbit            | Cell Signaling                             | sc-393592 | 1:1.000, 1:500 | WB, IHC     |
| CYP17A1                                     | Rabbit<br>(serum) | Gift from Prof<br>Alan Conley, UC<br>Davis |           | 1:2.000        | WB          |
| GAPDH                                       | Mouse             | Santa Cruz                                 | G-9       | 1:10.000       | WB          |
| ZO-1                                        | Mouse             | BD                                         | 610966    | 1:200          | IF          |
| Flag                                        | Mouse             | Sigma                                      | F1804     | 1:5.000        | WB          |
| HA                                          | Mouse             | Sigma                                      | H3663     | 1:5.000        | WB          |
| Myc                                         | Mouse             | Sigma                                      | M4439     | 1:5.000        | WB          |
| V5                                          | Mouse             | Sigma                                      | V8012     | 1:5.000        | WB          |
| TOM20                                       | Rabbit            | Santa Cruz                                 | Sc-11415  | 1:500          | WB          |
| SULT2A1                                     | Rabbit            | abcam                                      | Ab38416   | 1:500          | WB          |
| SF1 (A-1)                                   | Mouse             | Santa Cruz                                 | sc-393592 | 1:200          | IHC         |
| GFP                                         | Chicken           | abcam                                      | ab13970   | 1:200          | IHC         |
| Secondary RDye®<br>800 Mouse IgG            | Goat              | LICOR                                      | 925-32210 | 1:10.000       | WB          |
| Secondary RDye®<br>800 Rabbit IgG           | Goat              | LICOR                                      | 925-32211 | 1:10.000       | WB          |
| Secondary RDye®<br>800 Chicken IgG          | Donkey            | LICOR                                      | 925-32218 | 1:10.000       | WB          |
| anti-Rabbit IgG<br>(H+L) AlexaFluor<br>568  | Goat              | Life technologies                          | A-11011   | 1:250          | IF          |
| anti-Mouse IgG<br>(H+L) AlexaFluor<br>568   | Goat              | Life technologies                          | A-11004   | 1:250          | IF          |
| anti-Chicken IgY<br>(H+L) AlexaFluor<br>488 | Goat              | Life technologies                          | A-11039   | 1:250          | IF          |

*Constructs:* Human cDNAs encoding transcription factors SF1 (AB307718.1), Pbx1 (BT006705.1), WT1 (BC032861.2), Dax1 (BC011564.1) and Cited2 (AF109161.1) were subcloned into tagged vectors and after subcloned into pHIV-EGFP vector. pHIV-EGFP was a gift from Bryan Welm & Zena Werb (Addgene plasmid # 21373) (Welm et al., 2008). pHIV-EGFP-ERR $\alpha$  (NM\_004451.4) was subcloned from pCMV flag ERR $\alpha$ . HSD11B1-FLAG was a gift from Moses Chao (Addgene plasmid # 24096) (Jeanneteau et al., 2008). pLV-Azurite and pLV-mCherry were a gift from Pantelis Tsoulfas (Addgene plasmid # 36086 and #36084, respectively). Cloning details are shown below:

| T. factor         | Initial vector           | Donor vector         | Restriction sites used | Final plasmid               | Primers used                      |
|-------------------|--------------------------|----------------------|------------------------|-----------------------------|-----------------------------------|
| SF1               | pCDNA4-hSF1              | pT-Flag              | EcoRI/BamHI            | pFlag-SF1                   | FW: ggaattcATGGACTATTCGTACGAC     |
|                   |                          |                      |                        |                             | RW: cgggatccTCAAGTCTGCTTGGCTTG    |
| Pbx1              | pAd/CMV/PBX1-IRES-nEBFP2 | pCMVHA               | EcoRI/XhoI             | pCMVHA-Pbx1                 | FW: ggaattcggATGGACGAGCAGCCCAGG   |
|                   |                          |                      |                        |                             | RW: ccgctcgagCTACTGTATCCTCCTGTC   |
| WT1               | pAd/WT1-IRES-nAmCyanto   | pKMyc                | XbaI/NheI              | pKMyc-WT1                   | FW: gctctagaATGGAGAAGGGTTACAGC    |
|                   |                          |                      |                        |                             | RW: ctgctagcTCAAAGCGCCAGCTGGAG    |
| Dax1              | pAd/CMV/DAX1-IRES-nEGFP  | pENTR4-V5-2 (w234-1) | BamHI/XbaI             | pENTR4-V5-Dax1              | FW: cgggatccATGGCGGGCGAGAACCAC    |
|                   |                          |                      |                        |                             | RW: gctctagaTTATATCTTTGTACAGAG    |
| Cited2            | SB52                     | pCMVHA               | EcoRI/XhoI             | pCMVHA-Cited2               | FW: ggaattcggATGGCAGACCATATGATG   |
|                   |                          |                      |                        |                             | RW: ccgctcgagTCAACAGCTCACTCTGCT   |
| Flag-SF1          | pFlag-SF1                | pHIV-EGFP            | XbaI/BamHI             | pHIV-EGFP-Flag-SF1          | FW: gctctagaAGCACCATGGATTACAAA    |
|                   |                          |                      |                        |                             | RW: cgggatccTCAAGTCTGCTTGGCTTG    |
| HA-Pbx1           | pCMVHA-Pbx1              | pHIV-EGFP            | XbaI/BamHI             | pHIV-EGFP-HA-Pbx1           | FW: gctctagaACCATGTACCCATACGAT    |
|                   |                          |                      |                        |                             | RW: cgggatccCTACTGTATCCTCCTGTC    |
| Myc-WT1           | pKMyc-WT1                | pHIV-EGFP            | XmaI/BamHI             | pHIV-EGFP-Myc-WT1           | FW: cggtaacATGGAACAGAAACTCATC     |
|                   |                          |                      |                        |                             | RW: tccccccgggTCAAAGCGCCAGCTGGAG  |
| V5-Dax1           | pENTR4-V5-Dax1           | pHIV-EGFP            | HpaI/XbaI              | pHIV-EGFP-V5-Dax1           | FW: cggtaacTCCACCATGGAAGGTAAG     |
|                   |                          |                      |                        |                             | RW: gctctagaTTATATCTTTGTACAGAG    |
| HA-Cited2         | pENTR4-V5-Dax1           | pHIV-EGFP            | XbaI/BamHI             | pHIV-EGFP-HA-Cited2         | FW: gctctagaACCATGTACCCATACGAT    |
|                   |                          |                      |                        |                             | RW: cgggatccTCAACAGCTCACTCTGCT    |
| Flag-ERR $\alpha$ | pCMV flag ERR alpha      | pHIV-EGFP            | XbaI/XbaI              | pHIV-EGFP-Flag-ERR $\alpha$ | FW: gctctagaaccATGGATTACAAGGATGAC |
|                   |                          |                      |                        |                             | RW: ctgctctagaTCAGTCCATCATGGCCTC  |

pT-FLAG was a gift from Yegor Vassetzky (Addgene plasmid # 31385) (Dmitriev and Vassetzky, 2008)

pAd/CMV/PBX1-IRES-nEBFP2 was a gift from Edward McCabe (Addgene plasmid # 29755)

pAd/WT1-IRES-nAmCyan was a gift from Edward McCabe (Addgene plasmid # 29756)

pKMyc was a gift from Ian Macara (Addgene plasmid # 19400) (Joberty et al., 2000)

pAd/CMV/DAX1-IRES-nEGFP was a gift from Edward McCabe (Addgene plasmid # 29752)

pENTR4-V5-2 (w234-1) was a gift from Eric Campeau (Addgene plasmid # 17426) (Campeau et al., 2009)

SB52 was a gift from Shoumo Bhattacharya (Addgene plasmid # 21487) (Bhattacharya et al., 1999)

pCMV flag ERR alpha was a gift from Toren Finkel (Addgene plasmid # 10975) (Ichida et al., 2002)

*Primers:* PCR and qPCR primers (Sigma Aldrich)

| Gene               | Primer FW              | Primer RW                |
|--------------------|------------------------|--------------------------|
| Flag-SF1           | AGCACCATGGATTACAAA     | AGAAGCCCTTGCAGCTCTC      |
| HA-Pbx1            | AGAAGCCCTTGCAGCTCTC    | GCCTGCGCCTCATCCAAACT     |
| Myc-WT1            | CAGAAACTCATCTCTGAAGAG  | AGCTGTCCGGTGGGGGTGTGGC   |
| V5-Dax1            | CTATCCCTAACCTCTCCTCG   | AGCGCCACGTTCCGCCCCGCC    |
| HA-Cited2          | AGAAGCCCTTGCAGCTCTC    | TGTTGCCCGCGCCGTAGTGTA    |
| STAR               | AAGAGGGCTGGAAGAAGGAG   | TCTCCTTGACATTGGGGTTC     |
| CYP11A1            | AGACCTGGAAGGACCATGTG   | TCCTCGAAGGACATCTTGCT     |
| HSD3B2             | GCCTGTTGGTGGAAAGAGAAG  | GCAGGCTCTTTTCAGGAATG     |
| CYP21A2            | TGGACGTGATTCCCTTTCTC   | CACCCCTTGGAGCATGTAGT     |
| CYP17A1            | GTGGAGACCACCACCTCTGT   | CAGCAGGAGGAGACGGTTAC     |
| CYP11B1            | GGCAGAGGCAGAGATGCTG    | TCTTGGGTTAGTGTCTCCACCTG  |
| CYP11B2            | GGCAGAGGCAGAGATGCTG    | CTTGAGTTAGTGTCTCCACCAGGA |
| HSD17 $\beta$      | GTCCACTTGAGCCTGATCG    | GCGAAAGACTTGCTTGCTGT     |
| HSD11B1            | AAGCAGAGCAATGGAAGCAT   | GAAGAACCCATCCAAAGCAA     |
| HSD11B2            | TCATCACCGGCTGTGACTC    | GGGGCTGTTCAACTCCAATA     |
| MC2R               | AGTTCCTGCTTCAGAGCTG    | CTTGCTGTGTTGTTGATG       |
| MRAP               | GCCTCTGCCCCATACTACAG   | CGGACCAGGACATGTAGAGC     |
| Actin              | AGAGCTACGAGCTGCCTGAC   | AGCACTGTGTTGGCGTACAG     |
| GAPDH              | TGCACCACCAACTGCTTAG    | GGATGCAGGGATGATGTTC      |
| PPAR $\gamma$      | TCTGGCCCACCAACTTTGGG   | CTTACAAGCATGAACTCCA      |
| LPL                | GAGATTTCTCTGTATGGCACC  | CTGCAAATGAGACACTTTCTC    |
| Osteocalcin        | ACACTCCTCGCCCTATTG     | GATGTGGTCAGCCAACTC       |
| ALP                | CACGGGCACCATGAAGGAAAAG | TGGCGCAGGGGCACAGGAGACT   |
| Runx2 <sup>a</sup> | GCACAGACAGAAGCTTGAT    | CCCAGTTCTGAAGCACCT       |

|                       |                        |                       |
|-----------------------|------------------------|-----------------------|
| Aggrecan              | TACTCTGGGTTTTTCGTGACTC | CGATGCCTTTCACCACGACTT |
| Col-2                 | GCCTGGTGTTCATGGGTTT    | GTCCCTTCTCACCAGCTTTG  |
| Sox-9                 | GTACCCGCACTTGCAACAAC   | TCTCGCTCTCGTTCAGAAGTC |
| SF1 endog             | GAGAGCCAGAGCTGCAAGAT   | CTTGTACATCGGCCCAAAC   |
| ERR $\alpha$<br>endog | CTATGGTGTGGCCTCCTGTG   | GCACTCCCTCCTTGAGCAT   |
| Pbx1<br>endog         | CAGATGCAGCTCAAGCAGAG   | CTCTTTGGCTTCCTCACTGG  |
| WT1<br>endog          | CAGGCCAGGATGTTTCCTAA   | AATGAGTGGTTGGGGAACTG  |
| Dax1<br>endog         | CCAAGCCATCAAGTGCTTTC   | ATTTGCTGAGTTCCCCACTG  |
| Cited2<br>endog       | CAAAAACGGAAGGACTGGAA   | TGTATGTGCTCGCCATTAG   |
| Pax6                  | GCCAGCAACACAGCTAGTCA   | TGTGAGGGCTGTGTCTGTC   |
| TH                    | CCGTGCTAAACCTGCTCTTC   | ATGGTGGATTTTGGCTTCAA  |
| 12S Mito              | GCTCGCCAGAACACTACGAG   | CAGGGTTTGCTGAAGATGGCG |
| ESR1                  | TGGAGATCTTCGACATGCTG   | TCCAGAGACTTCAGGGTGCT  |
| DMRT1                 | GTCATGAGGCACGGGTTACT   | TGGAGATCTTCGACATGCTG  |
| CYB5                  | TTCAGAAGCACAACCACAGC   | AACTTCTTCCCCACCAGGAT  |
| SULT2A1               | TGGTTTGACCACATTCATGG   | GGGCCACTGTGAAGTGATTT  |
| LHR                   | CAGCCACTGCTGTGCTTTTA   | CACTCTCAGCAAGCATGGAA  |

<sup>a</sup> These primers detect both A and B isoforms.

## Cell culture

### *Urine-derived stem cells (USCs)*

Urine was collected in sterile containers and processed as soon as possible under a sterile tissue culture cabinet. Time from urine collection to processing varied from 1 min to 30 mins. Urine was transferred into sterile 50-ml tubes and centrifuged at 400g for 10 min at room temperature and the supernatant was aspirated. Pellets were gently resuspended and washed with Phosphate Buffered Saline (PBS, Sigma) supplemented with 100 U ml<sup>-1</sup> of penicillin (Sigma), 100  $\mu$ g ml<sup>-1</sup> of streptomycin (P/S) (Sigma) and 500 ng ml<sup>-1</sup> of amphotericin B (Sigma). Samples were centrifuged at 200 g for 10 min at room temperature and resuspended in 12 ml of primary medium (DMEM/high glucose and Ham's F12 nutrient mix (1:1), supplemented with 10% (vol/vol) Foetal Bovine Serum and P/S (Sigma) supplemented with the REGM SingleQuot kit supplements (CC-4127, Lonza) and 2.5  $\mu$ g ml<sup>-1</sup> amphotericin B (Sigma) and then 1 ml was transferred into each well of a 12-well plate. 1 ml of



primary medium was added to the culture daily for the next 3 days and then medium was changed to proliferation medium (REBM medium (Lonza, CC-3191) supplemented with 10% (vol/vol) FBS, 1% P/S and the REGM SingleQuot kit supplements. Cells were cultured in a designated humidified 37°C incubator with 5% CO<sub>2</sub>. Appearance of colonies was checked daily from day 4. Type-II colonies were passaged into T75 flasks and then processed for storage in liquid nitrogen or further amplified for CD-classification through flow cytometry or experiments.

#### *Fibroblasts*

Fibroblast isolation was performed as described previously (Poliandri et al., 2017). Briefly, a 4 mm punch biopsy from arm was obtained with a biopsy punch (Stiefel, SmithKline Beecham Ltd, Slough, UK) placed immediately into 15 ml-falcon containing isolation medium (DMEM supplemented with 10% (vol/vol) FBS and 1% P/S). Skin sample was transferred in a 10-dish with digestion media (DMEM/high glucose, 20%FBS (vol/vol), 0.25% collagenase type-I, 0.05% DNase-I and 1% P/S –all from Sigma-), chopped into 1 square mm cubes and placed at 37°C tissue culture incubator overnight in a 15 ml-falcon tube with digestion media. Samples were centrifuged and pellet resuspended in 5 ml of isolation medium before plating in gelatin coated T25 flasks. Cells were kept in human fibroblast media (DMEM/High glucose with sodium pyruvate and L-glutamine, 20% FBS (vol/vol) and 1% P/S).

#### *Late outgrowth endothelial progenitor cells (L-EPCs)*

L-EPCs were isolated as described previously (Martin-Ramirez et al., 2012). Briefly, 25-50 ml of blood were diluted 1:1 in PBS in a 50 ml tube. 10 ml of diluted blood was placed on top of 4 ml of Ficoll (GE Healthcare) in 15 ml falcon tubes and centrifuged at 1000 g for 20 min without brake. The buffy coat formed was collected, washed with PBS and centrifuged at 540 g for 7 min with brake. Supernatant was discarded and pellet resuspended in 5 ml of culture medium (EGM-2 Bullekit, Lonza, CC-3162).

#### *Bone marrow endothelial cells (BMEC)*

BMEC were a kind gift of Dr Egle Solito (Schweitzer et al., 1997; Solito et al., 2000), Queen Mary University, London.

#### *HEK293T*

HEK293T were cultured with DMEM, 10% FBS and 1% P/S.

### **Lentiviral production**

Lentiviral particles were prepared using 90% confluent HEK293T cells. 1 hour before transfection medium was replaced to serum-free DMEM. Cells were transfected with pHIV-EGFP vector (with the ORF of interest) together with the packaging vectors pCMVdr8.2 and pMD2.G using polyethileneamine reagent (PEI, Warrington, USA). 2 hours after transfection medium was replaced to DMEM, 10%FBS (vol/vol), 1% P/S. Medium was collect after 24 and 48 hours, filtered and ultracentrifuged at 50.000 g for 1 hour at 16°C. The resulting pellet was resuspended in PBS, aliquoted and immediately stored at -80°C.

Precision LentiORF SF1 (NR5A1) lentiviral particles were purchased from Dharmacon (vector pLOC-SF1). The vector encoding SF1 is driven by the CMV promoter. pLOC vector also contains a nuclear localized TurboGFP™ (Evrogen™, Moscow, Russia) and a blasticidin S resistance for selection.

### **Cell reprogramming**

60.000 cells/well of a 6-well plate were infected with lentiviral particles at a MOI=200 with 8µg/ml of polybrene (Millipore, TR-1003-G). Medium was replaced after 12 hours and treatments with different molecules were added after 2 days. Cells were cultured for additional 5 to 10 days prior to analysis. Concentrations used to treat cells are as follows: 8-bromo-cyclic AMP (8-br-cAMP), 100 µM (Sigma, B5386); db-cAMP, 200µM (Sigma, D0260); ACTH, 1µM (Sigma A0423); Angiotensin II human, 10 µM (Sigma, A9525); Retinoic acid (ATRA), 10 µM (Sigma, R2625); KCl, 16 mM (Sigma, P9541); Licorice (Sigma, G2137); Bombesin, 0,5 µg/ml (Bachem, H-2155); WNT4, 100 ng/ml (R&D Systems, 6076-WN-005), LH alpha/beta heterodimer, 100 ng/ml (R&D Systems, 8899-LH-010), D-TRP6-LHRH, 1µM. Triptorelin (D-TRP6-LHRH) was a kind gift of Prof. Andrew Schally.

### **Gene expression analysis**

RNA was extracted from human adrenals (adjacent to Conn's) and RNA from ovary and testis was purchased from Amsbio (CR560139) and Takara (636533), respectively.

Messenger RNA was purified with RNeasy Mini Kit (Qiagen, 74106) using the RNase-Free DNase Set (Qiagen, 79254) to eliminate gDNA contamination. 10-500 ng of mRNA were incubated with 60ng/µl

of random primers 5 min at 70°C followed by incubation with 500 µM dNTPs, 40 U of RNase inhibitor, 200 U of M-MuLV RT and 1X M-MuLV buffer for 10 min at 25°C, 90 min at 42°C and 15 min at 70°C to generate cDNA. All products were purchased from NEB. Samples were diluted to a final concentration of 2 ng/ml and 2 ng of cDNA were used for qPCR experiments.

Standard PCR experiments were performed using Taq DNA polymerase (NEB, M0273) and SYBR FAST Universal Kit (KAPA Biosystems, KK4602) for qPCR experiments.

qRT-PCR was performed on a Stratagene Mx3000P thermocycler using KAPA SYBR fast Universal Kit (KAPA Biosystems, KK4602) with 500 nM forward and reverse primers. Data were analyzed using MxPro software (Stratagene, Stockport, UK). Relative quantification analysis was performed following the  $2^{-\Delta\Delta CT}$  method (Livak and Schmittgen, 2001) and data was normalized to Actin expression.

### **Immunocytochemistry**

Control USCs or USCs differentiated for 8 days were fixed using 4% paraformaldehyde in PBS for 20 min on ice. Permeabilization was performed using PBS containing 0.02% saponin for 7 min and 10 mM glycine containing 0.01% saponin for 15 min. Cells were blocked for 1 h with PBS containing 0.01% saponin, 10 mM glycine and 5% (w/v) BSA before incubation with primary antibody (dilution 1:300) in buffer A (PBS containing 0.01% saponin and 1% BSA) overnight. Proteins were incubated 45 min with the corresponding Alexa Fluor® secondary antibodies (Thermo Fisher Scientific) diluted 1:400 in buffer A and nuclei were stained using Hoechst 33259 (Invitrogen). Images were obtained with a fluorescence microscope Zeiss Axio Vert.A1 equipped with a AxioCam MRm camera.

### **Immunohistochemistry**

Specimens from in vivo transplantation experiments were either embedded in paraffin or in Optimal Cutting Temperature (OCT) compound.

*Paraffin embedding:* Mouse adrenals/kidneys were fixed in 4% PFA (Acros Organics, 416780010) overnight at 4°C and dehydrated in a series of ethanol washes, 50%, 70%, 90% and 100% for 1 hour each on a rotating plate. After two incubations with Xylene (Fischer Scientific, X/0250/17) for 5 and 10 minutes adrenals were placed in a container with melted paraffin (VWR, 361077E) overnight at 56°C and finally placed in embedding cassettes (VWR, 18000-244) filled with melted paraffin. Paraffin blocks were cut at 6-8µm using a rotary microtome (Thermo scientific, 902100A) and sections

transferred on superfrost plus glass slides (VWR, 48311-703) covered with water. Sections were left on the slides on a hotplate (Thermoscientific, E181SL) at 56°C for 30-60 minutes. Once sections were flat, excess water was removed and sections were allowed to dry at room temperature.

*Sucrose-cryopreservation and OCT-embedding:* Mouse adrenals/kidneys were fixed in 4% PFA overnight at 4°C, followed by PBS wash for 1 hour. The following day specimens were incubated in filtered 30% sucrose solution (Fisher Scientific, S/8560/60) overnight. Finally they were transferred in a container filled with liquid OCT (VWR, 361603E), orientated and placed on dry ice until OCT solidified. OCT embedded samples were cut at 14-18µm using a cryostat (Leica GM1510S) and placed on superfrost plus glass slides. Sections were incubated at room temperature overnight and then stored at -80°C.

*Fluorescent Immunohistochemistry on fresh frozen sections:* Sections were fixed in 4% PFA for 15 minutes on ice, blocked with 10% normal goat serum (Sigma-Aldrich, G9023) in PBS-0.1% Triton for 1 hour and incubated overnight with anti-GFP antibody diluted in PBS at room temperature. Slides were washed and then incubated with secondary antibody and DAPI (1:1000) in PBS-Triton and mounted with glass cover slips using PBS:Glycerol (Sigma-Aldrich, G5516) solution at a ratio of 1:3. Slides were visualized using a Leica DM5500B automated upright microscope and stored at 4°C.

*Chromogenic Immunohistochemistry with DAB on paraffin sections:* Sections were deparaffinised in Xylene incubations, washed in 100% Ethanol and reacted with 3% H<sub>2</sub>O<sub>2</sub> (Sigma Aldrich, 21,676-3) diluted in Methanol (Fischer Scientific, M/4000/PC17) for 30 minutes at room temperature to block endogenous peroxidase activity. Sections were rehydrated in decreasing concentrations of Ethanol (100%, 90%, 70% and 50%) for 10 minutes each, followed by incubation in water for 10 minutes and washes in PBS-0.1% Triton. After blocking and overnight incubation with primary antibody as above, slides were incubated with biotinylated secondary antibody for 2 hours at room temperature followed by 1 hour incubation with Avidin-Biotin Complex (ABC) (Vector labs, PK-6100). Slides were developed with DAB (Vector labs, SK-4105) and the reaction was stopped by placing slides in water. Slides were dehydrated in increasing concentrations of ethanol (50%, 70%, 90% and 100%), xylene

and mounted using Vectamount mounting medium (Vector labs, H-5000). Slides were visualized using a Leica DM5500B automated upright microscope equipped with a DFX365 FX camera.

*Hematoxylin and Eosin staining:* Sections were incubated with Hematoxylin Solution Gill No.3 (Sigma, GHS332) solution for 2 minutes, washed and incubated in 1% acid alcohol (1% Hydrochloric acid (Fisher Scientific, A481-212) in 70% Ethanol) for 1 minute. Sections were dipped in 0.2% ammonia solution (Sigma-Aldrich, 320145) diluted in distilled water, washed and incubated in 80% Ethanol for 1 minute followed by Eosin (National diagnostics, HS-402) incubation for 15 seconds. Sections were further dehydrated by incubating them in 95% Ethanol and 100% Ethanol for 1 minute each followed by 2 Xylene incubations for 3 minutes each. Following staining and dehydration steps, sections were mounted with Vectamount (Vector, H-5000).

### **Western Blot**

Immunoblot analysis was performed as described previously (Rodríguez-Asiain et al., 2011). Briefly, SDS-PAGE was used to size-separate proteins followed by transfer to nitrocellulose membranes (Whatman, UK). After blocking membranes with PBS containing 0,1% Tween-20 and 5% skimmed milk, primary antibody was added over-night. Proteins were detected using secondary fluorescent antibodies (LICOR) and visualized using LICOR Odyssey Scanner 2.2.

### **Hormone quantification**

USCs cell supernatant was collected 8 days after reprogramming. Quantification of metabolites was achieved by mass spectrometry. Cortisol was also measured using cortisol ELISA Kit (Abcam, ab154996) according to the manufacturer's instructions.

*Calibrator, Internal Quality Control and Internal Standard solutions:* Individual stock solutions for all analytes and internal standards (Is) were prepared in methanol (each 1000 mg/L). These were then used to prepare combined working solutions containing all analytes for calibration and internal quality control (IQC) purposes. To make these, appropriate volumes of each stock solution were added to a glass tube and then dried down under nitrogen at 60°C. The steroids were then reconstituted in methanol to create calibrator and IQC working solutions each containing: DHEAS (2000 µg/mL),

cortisol (200 µg/mL), 17-hydroxypregnenolone (160 µg/mL) 17-hydroxyprogesterone (120 µg/mL), androstenedione (80 µg/mL), pregnenolone, corticosterone, 11-deoxycortisol, 21-deoxycortisol, cortisone (each at 40 µg/mL), testosterone (8 µg/mL) and 11-deoxycorticosterone (4 µg/mL). The working solutions were each further diluted in methanol to create three further working solutions as follows: 3+20 (v/v), 1+39 (v/v) and 1:199 (v/v). All four working solutions were then used to make appropriate volumes of calibration standard/IQC solution by dilution in DMEM. After thorough mixing and equilibration (24 h, 2–8 °C), calibrators and IQC solutions were portioned (250 µL) in 1.5 mL microcentrifuge tubes (Eppendorf, Stevenage, UK) and stored at -20 °C until required. A combined IS sub-stock solution was prepared in methanol containing deuterated steroids at the following concentrations: DHEAS-D2 (25000 µg/mL), cortisol-D4 (2500 µg/mL), 17-hydroxypregnenolone-D3 (2000 µg/mL) 17-hydroxyprogesterone-D8 (1500 µg/mL), androstenedione-D7 (1000 µg/mL), pregnenolone-D4, corticosterone-D8, 11-deoxycortisol-D2, 21-deoxycortisol-D8, cortisone-D2 (each at 500 µg/mL), testosterone-D3 (100 µg/mL) and 11-deoxycorticosterone-D8 (50 µg/mL). The IS working solution was freshly prepared before each batch by dilution of 50 µL of the IS sub-stock stock solution in acetonitrile to 20 mL in a volumetric flask.

*Specimen processing:* Portions of frozen calibrators, IQC solutions and unknown media samples were thawed and mixed at room temperature by inversion before analysis. Aliquots (250 µL) of unknown media samples were then transferred into 1.5 mL micro-centrifuge tubes. Subsequently, 250 µL of IS working solution and 500 µL of ice-cold acetonitrile was added to each sample. Tubes were capped and thoroughly vortex-mixed for 30 seconds. Precipitated protein was then pelleted by centrifugation (12,000 rpm, 10 min) and the remaining supernatant transferred to a 10 mL glass tube containing 300 µL of deionised water (dH<sub>2</sub>O). Ethyl acetate (1 mL) was added and the tube contents vortex-mixed (5 min). Following a brief centrifugation (1,000 rpm, 1 min) to clarify aqueous and organic layers, the top organic layer was removed to a clean tube using a glass pipette. The extract was then evaporated to dryness under nitrogen at 60°C, re-constituted in 200 µL of a 65+35 (v/v) mixture of dH<sub>2</sub>O:methanol and transferred to a glass insert autosampler vial.

*LC-MS/MS procedure:* Extracts were injected (100 µL) onto the LC column at a flow rate of 0.40 mL/min. Mobile phases were (A) dH<sub>2</sub>O containing 0.1% (v/v) formic acid and (B) methanol

containing 0.1% (v/v) formic acid. The column was maintained at 40°C. LC instrument control was performed using Aria MX (Version 1.1, ThermoFisher Scientific).

MS/MS was carried out in positive mode using atmospheric pressure chemical ionisation (APCI; needle discharge current 5 µA; temperatures: vaporiser 500 °C; capillary 400 °C; auxiliary and sheath gases 20 and 5 (arbitrary units) respectively. Data were collected in high-resolution (0.40 m/z full width at half maximum - FWHM), selected reaction monitoring (SRM) mode, with two m/z transitions per analyte and one m/z transition for each internal standard. MS instrument control and data acquisition were performed using Xcalibur (version 2.2 SP1.48, ThermoFisher Scientific). Post-analysis processing was carried out using LC QuanTM (version 2.6, ThermoFisher Scientific). For assay calibration, peak area ratios (analyte quantifier to IS) were used to construct calibration graphs, with lines fitted by linear regression. The intercepts were not forced through zero, and line weighting was applied (1/concentration). Deuterated ISs were used for all steroids in the developed method.

### Flow cytometry

5x10<sup>5</sup> USCs at passage 2 were harvested and resuspended in 100 µl of PBS containing 1,5% BSA, 5% FBS and 0,5% Na-Azide and were incubated for 30 min on ice with the following antibodies purchased from R&D biosystems:

| Antibody         | Specie | Dilution | Code   |
|------------------|--------|----------|--------|
| Anti-CD29        | Mouse  | 1:10     | 561795 |
| Anti-CD44        | Mouse  | 1:10     | 560977 |
| Anti-CD54        | Mouse  | 1:10     | 560971 |
| Anti-CD73        | Mouse  | 1:10     | 561014 |
| Anti-CD105       | Mouse  | 1:40     | 560839 |
| Anti-CD146       | Mouse  | 1:10     | 561013 |
| Anti-CD166       | Mouse  | 1:10     | 560903 |
| Anti-SSEA-4      | Mouse  | 1:10     | 560126 |
| Anti-CD31        | Mouse  | 1:10     | 560984 |
| Anti-CD34        | Mouse  | 1:10     | 560942 |
| Anti-CD45        | Mouse  | 1:10     | 560976 |
| FITC-Isotype CNT | Mouse  | 1:10     | 555748 |
| PE-Isotype CNT   | Mouse  | 1:10     | 551436 |

Samples were analyzed in LSR Fortessa Flow Cytometer (BD Biosciences).



### **Differentiation of USCs into mesenchymal lineages and analysis.**

USCs at passage 2 were grown in proliferation medium until confluent. 48 hours later medium was changed to adipogenic (DMEM 10% FBS, 10 ng/ml insulin, 500 mM 3-isobutyl-1-methylxanthine, 1 mM dexamethasone, 1 mM Rosiglitazone), chondrogenic (DMEM 10% FBS, 0.1 mM dexamethasone, 10 ng/ml transforming growth factor (Tgf)  $\beta$ 1 (R&D Systems), insulin-transferrin-selenium (ITS) (Life Technologies), and 50 mg/ml ascorbate) and osteogenic (DMEM 10% FBS, 0.1 mM dexamethasone, 100 mg/ml ascorbate, 10 mM  $\beta$ -glycerophosphate) media for 21 days, while controls were kept in proliferation media. Medium was changed twice a week. Cells were stained with Oil Red O (adipogenic lineage), Alcian Blue (chondrogenic lineage) and Alizarin Red (osteogenic medium) as reported previously (Guasti et al., 2012). Images were taken using Zeiss Axio Vert.A1 inverted microscope equipped with an Axiocam 105 camera.

### **Telomerase activity assay**

$2 \times 10^4$  L-EPCs, fibroblasts and USCs at passage 2 from different donors were harvested and assayed using a Telo TAAGG ELISA kit (Roche, 11854666910) according to the manufacturer's instructions. HEK293T cells were used as a positive control of the assay.

### **Animal experiments**

*Ethics Statement:* All animal experiments were performed in strict accordance with animal protocol, approved by the ethical board of Landesdirektion Sachsen, Germany (protocol N: DD24-5131/354/28).

*Mice:* Female 8 weeks old C57BL/6 ([http://www.criver.com/files/pdfs/rms/c57bl6/rm\\_rm\\_d\\_c57bl6n\\_mouse.aspx](http://www.criver.com/files/pdfs/rms/c57bl6/rm_rm_d_c57bl6n_mouse.aspx)) and SCID (<http://www.criver.com/products-services/basic-research/find-a-model/fox-chase-scid-mouse>) mice were obtained from Charles River Laboratory. Mice were maintained under 12:12 h light/dark cycle and fed ad libitum. After the arrival the mice were given 3-5 day acclimatization period before beginning of the experiments.

Mice were anesthetized by ketamine/xylazine (100mg/kg Ketamine und 10 mg/kg xylazine).

For cell transplantation under the kidney capsule of SCID mice a longitudinal incision was made with fine scissors in the abdominal skin. A 3-mm incision was made in the kidney capsule, which was

carefully separated from the kidney cortex, and cells in alginate or fibrin clot were inserted into the formed pouch. The same procedure with repeated with the second kidney.

*Cell encapsulation in alginate:* Cells were mixed with 25 µl of 3 % UP-MVG alginate (Novamatrix), dissolved in Custodiol-HTK solution (H.S. Pharma) and polymerized in 70 mM SrCl<sub>2</sub> for 15 min. The thickness of the alginate/cell slab was 550 µm. Just before the transplantation, each slab was cut in halves. One half was transplanted under each kidney capsule of C57BL/6 mice.

*Cell transplantation in fibrin clot.* Thrombin and Fibrinogen were obtained in Sigma-Aldrich. Cells were mixed with 10 µl of Thrombin (10 u/ml). 10 µl of Fibrinogen (10 mg/ml) was added to the cell/Thrombin mixture and immediately placed in the pouch under kidney capsule of SCID mice.

*Intraadrenal transplantation.* A short longitudinal incision was made on the left lateral body wall to open the retroperitoneal space. The left adrenal was exposed, and 5\*10<sup>5</sup> cells concentrated in a total volume of 10 µL were pipetted directly into the adrenal through a capillary tip.

Animals were monitored for up to 3 weeks. Then they were euthanized by cervical dislocation, kidneys or adrenals were removed and collected for immunohistochemical analysis.

### **Collection of urine samples from donors**

This study has been performed under the ethical approval NHS REC form reference: 13/LO/0224. All patients involved were previously informed and consent forms were obtained prior to analysis of samples. For patient #2 clinical and biochemical diagnosis of congenital adrenal hyperplasia due to a presumptive 3B hydroxysteroid dehydrogenase mutation was made on the basis of: a raised serum DHEAS; failure of a clinical response to ovarian suppression for hirsutism and urine gas chromatography demonstrating raised excretion rates of 3 beta-hydroxy-5-ene steroids i.e. dehydroepiandrosterone and low cortisol metabolite output - tetrahydrocortiosone (THE) and tetrahydrocortisol (THF).

### **Sequencing**

PCR products were purified using QIAquick PCR Purification Kit (Qiagen) and Sanger sequencing was performed by GATC Biotech (Germany). Sequences were analyzed using Chromas 2.6.2 software.

### **Cell counting assay.**

Cell Counting Kit-8 (Sigma) was used to determine the viability of cells in culture according to the manufacturer's instructions.

### **Establishment of inducible cell lines**

SparQ cumate switch pCDH-CuO-MCS-IRES-GFP-EF1-CymR-T2A-Puro All-in-one inducible lentivector (QM812B-1) was purchased from Cambridge Bioscience Ltd, SF1 was subcloned using primers FW ctagctagcaacATGGACTATTCGTACGAC (NheI) and RW gcatcgttcgaaTCAAGTCTGCTTGGCTTG (BstBI) and lentiviral particles were generated as described previously. USC<sub>s</sub> P2 were infected with lentiviral particles (MOI 50) and stable cell lines were established after two weeks in REBM medium containing 1 mg/ml puromycin. Different concentrations of cumate solution 1000x (QM100A-1, Cambridge Bioscience Ltd) were added to the medium before analysis.

### **Protein array of human reprogrammed steroidogenic cells**

Protein array was performed by Sciomics GmbH (Germany). USC<sub>s</sub>, fibroblasts and BMEC at P2 were reprogrammed to steroid-producing cells for 8 days.

*Protein extraction.* Samples were extracted with scioExtract buffer (Sciomics) using the extraction SOPs and the bulk protein concentration was determined by BCA assay.

*Label reaction.* Samples were labelled at an adjusted protein concentration of 1 mg/mL for one hour with scioDye1 and scioDye 2. After one hour, the reaction was stopped by the addition of hydroxylamine. Excess dye was removed 30 min later and the buffer exchanged to PBS. Samples were analysed in a dual-colour approach using a reference-based design on ten scioDiscover antibody microarrays (Sciomics) targeting 900 different proteins with more than 1,000 antibodies. Each antibody is represented on the array in four replicates. The arrays were blocked with scioBlock (Sciomics) on a Hybstation 4800 (Tecan, Austria) and afterwards the samples were incubated competitively using a dual-colour approach. After incubation for three hours, the slides were thoroughly washed with 1x PBSTT, rinsed with 0.1x PBS as well as with water, and subsequently dried with nitrogen.

*Data acquisition and analysis.* Slide scanning was conducted using a Powerscanner (Tecan, Austria) with identical instrument laser power and adjusted PMT settings. Spot segmentation was performed with GenePix Pro 6.0 (Molecular Devices, Union City, CA, USA). Acquired raw data were analysed

using the linear models for microarray data (LIMMA) package of R-Bioconductor after uploading the median signal intensities.

For normalisation, a specialised invariant Lowess method was applied. For analysis of the samples a one-factorial linear model was fitted with LIMMA resulting in a two-sided t-test or F-test based on moderated statistics. All presented p-values were adjusted for multiple testing by controlling the false discovery rate according to Benjamini and Hochberg. Proteins were defined as differential for an adjusted p value < 0.05 and  $-0.5 < \log_{2}FC < 0.5$ . For cluster analysis log ratios of signal intensities of sample and reference were used (M-value). Differences in protein expression between different samples or sample groups are presented as log fold changes (logFC) calculated for the basis 2. In a study comparing samples versus control a  $\log_{2}FC = 1$  means that the sample group had on average a 2<sup>1</sup> = 2 fold higher signal as the control group.  $\log_{2}FC = -1$  stands for 2<sup>-1</sup> = 1/2 of the signal in the sample as compared to the control group.

#### Resource Table

| REAGENT or RESOURCE                   | SOURCE                                    | IDENTIFIER |
|---------------------------------------|-------------------------------------------|------------|
| <b>Antibodies</b>                     |                                           |            |
| StAR                                  | Abcam                                     | Ab58013    |
| SF1                                   | Invitrogen                                | 434200     |
| HSD11B1                               | Abcam                                     | Ab39364    |
| HSD11B2                               | Santa Cruz                                | Sc365529   |
| HSD3B2                                | Avivasysbio                               | QC14296    |
| CYP11A1 (D8F4F)                       | Cell Signaling                            | sc-393592  |
| CYP17A1                               | Gift from Prof Alan Conley, UC Davis, USA |            |
| GAPDH                                 | Santa Cruz                                | G-9        |
| ZO-1                                  | BD                                        | 610966     |
| Flag                                  | Sigma                                     | F1804      |
| HA                                    | Sigma                                     | H3663      |
| Myc                                   | Sigma                                     | M4439      |
| V5                                    | Sigma                                     | V8012      |
| SF1 (A-1)                             | Santa Cruz                                | sc-393592  |
| GFP                                   | abcam                                     | ab13970    |
| Secondary RDye® 800 Mouse IgG         | LICOR                                     | 925-32210  |
| Secondary RDye® 800 Rabbit IgG        | LICOR                                     | 925-32211  |
| Secondary RDye® 800 Chicken IgG       | LICOR                                     | 925-32218  |
| anti-Rabbit IgG (H+L) AlexaFluor 568  | Life technologies                         | A-11011    |
| anti-Mouse IgG (H+L) AlexaFluor 568   | Life technologies                         | A-11004    |
| anti-Chicken IgY (H+L) AlexaFluor 488 | Life technologies                         | A-11039    |
| Anti-CD29                             | R&D biosystems                            | 561795     |
| Anti-CD44                             | R&D biosystems                            | 560977     |

|                                                      |                                                          |             |
|------------------------------------------------------|----------------------------------------------------------|-------------|
| Anti-CD54                                            | R&D biosystems                                           | 560971      |
| Anti-CD73                                            | R&D biosystems                                           | 561014      |
| Anti-CD105                                           | R&D biosystems                                           | 560839      |
| Anti-CD146                                           | R&D biosystems                                           | 561013      |
| Anti-CD166                                           | R&D biosystems                                           | 560903      |
| Anti-SSEA-4                                          | R&D biosystems                                           | 560126      |
| Anti-CD31                                            | R&D biosystems                                           | 560984      |
| Anti-CD34                                            | R&D biosystems                                           | 560942      |
| Anti-CD45                                            | R&D biosystems                                           | 560976      |
| FITC-Isotype Control                                 | R&D biosystems                                           | 555748      |
| PE-Isotype Control                                   | R&D biosystems                                           | 551436      |
| <b>Bacterial and Virus Strains</b>                   |                                                          |             |
| Precision LentiORF SF1 (NR5A1) lentiviral particles  | Dharmacon                                                | OHS5900     |
| JM109 Competent Cells                                | Promega                                                  | L2005       |
| <b>Chemicals, Peptides, and Recombinant Proteins</b> |                                                          |             |
| Phosphate Buffered Saline                            | Sigma Aldrich                                            | 79382-50TAB |
| Penicillin/streptomycin (P/S)                        | Sigma Aldrich                                            | P4333       |
| Amphotericin B                                       | Sigma Aldrich                                            | A2942       |
| Polyethileneamine reagent (PEI)                      | Polysciences, Inc                                        | 23966       |
| 8-bromo-cyclic AMP                                   | Sigma Aldrich                                            | B5386       |
| db-cAMP                                              | Sigma Aldrich                                            | D0260       |
| ACTH                                                 | Sigma Aldrich                                            | A0423       |
| Angiotensin II human                                 | Sigma Aldrich                                            | A9525       |
| Retinoic acid (ATRA)                                 | Sigma Aldrich                                            | R2625       |
| Licorice                                             | Sigma Aldrich                                            | G2137       |
| Bombesin                                             | Bachem                                                   | H-2155      |
| D-TRP6-LHRH                                          | Gift from Prof. Andrew Schally, University of Miami, USA |             |
| Polybrene                                            | Millipore                                                | TR-1003-G   |
| Hoechst 33259                                        | Invitrogen                                               | H3569       |
| Paraformaldehyde                                     | Acros Organics                                           | 416780010   |
| Paraffin                                             | VWR                                                      | 361077E     |
| Liquid OCT                                           | VWR                                                      | 361603E     |
| DAB                                                  | Vector labs                                              | SK-4105     |
| Avidin-Biotin Complex (ABC)                          | Vector labs                                              | PK-6100     |
| Vectamount mounting medium                           | Vector labs                                              | H-5000      |
| Hematoxylin Solution Gill No.3                       | Sigma Aldrich                                            | GHS332      |
| 0.2% ammonia solution                                | Sigma Aldrich                                            | 320145      |
| Eosin                                                | National diagnostics                                     | HS-402      |
| MitoTracker Red CMXRos                               | Thermo Scientific                                        | M7512       |
| UP-MVG alginate                                      | Novamatrix                                               | 4200106     |
| Thrombin                                             | Sigma Aldrich                                            | T4648       |
| Fibrinogen                                           | Sigma Aldrich                                            | F3879       |
| Cumate solution 1000x                                | Cambridge Bioscience                                     | QM100A-1    |
| Rosiglitazone                                        | Molekula                                                 | 48650295    |
| Transforming Growth Factor- $\beta$ 1 human          | Sigma Aldrich                                            | T7039       |
| Insulin-transferrin-selenium (ITS)                   | Thermo Fisher                                            | 41400045    |
| <b>Critical Commercial Assays</b>                    |                                                          |             |
| RNeasy Mini Kit                                      | Qiagen                                                   | 74106       |
| RNase-Free DNase Set                                 | Qiagen                                                   | 79254       |
| KAPA SYBR fast Universal Kit                         | KAPA Biosystems                                          | KK4602      |

|                                                                               |                               |                         |
|-------------------------------------------------------------------------------|-------------------------------|-------------------------|
| Cortisol ELISA Kit                                                            | Abcam                         | ab154996                |
| Telo TAAGG ELISA kit                                                          | Roche                         | 11854666910             |
| QIAquick PCR Purification Kit                                                 | Qiagen                        | 28104                   |
| Cell Counting Kit-8                                                           | Sigma Aldrich                 | 96992                   |
| <b>Experimental Models: Cell Lines</b>                                        |                               |                         |
| Human embryonic kidney: HEK293T                                               | ATCC                          | CRL-3216                |
| <b>Experimental Models: Organisms/Strains</b>                                 |                               |                         |
| Mouse: C57BL/6NCrl                                                            | Charles River Laboratory      | 027                     |
| Mouse: Fox Chase SCID Mouse CB17/lcr-Prkdc <sup>scid</sup> /lcrIcoCrl         | Charles River Laboratory      | 236                     |
| <b>Oligonucleotides</b>                                                       |                               |                         |
| Primers for PCR and qPCR, see Constructs and Primers                          | This paper                    | N/A                     |
| Primers for molecular cloning, see Constructs and Primers                     | This paper                    | N/A                     |
| <b>Recombinant DNA</b>                                                        |                               |                         |
| pCDH-CuO-MCS-IRES-GFP-EF1-CymR-T2A-Puro All-in-one inducible IRES lentivector | Cambridge Bioscience          | QM812B-1                |
| All constructs newly generated, see Constructs and Primers                    | This paper                    | N/A                     |
| pHIV-EGFP                                                                     | Welm et al. 2008              | Addgene Plasmid # 21373 |
| HSD11B1-FLAG                                                                  | Jeanneteau et al. 2008        | Addgene Plasmid # 24096 |
| pLV-Azurite                                                                   | Dull et al., 1998             | Addgene plasmid # 36086 |
| pLV-mCherry                                                                   | Dull et al., 1998             | Addgene plasmid # 36084 |
| pT-FLAG                                                                       | Dimitriev and Vassetzky, 2008 | Addgene plasmid # 31385 |
| pAd/CMV/PBX1-IRES-nEBFP2                                                      | N/A                           | Addgene plasmid # 29755 |
| pAd/WT1-IRES-nAmCyan                                                          | N/A                           | Addgene plasmid # 29756 |
| pKMyC                                                                         | Joberty et al. 2000           | Addgene plasmid # 19400 |
| pAd/CMV/DAX1-IRES-nEGFP                                                       | N/A                           | Addgene plasmid # 29752 |
| pENTR4-V5-2 (w234-1)                                                          | Campeau et al. 2009           | Addgene plasmid # 17426 |
| SB52                                                                          | Bhattacharya et al 1999       | Addgene plasmid # 21487 |
| pCMV flag ERR alpha                                                           | Ichida et al. 2002            | Addgene plasmid # 10975 |

## Bibliography

- Bhattacharya, S., Michels, C.L., Leung, M.-K., Arany, Z.P., Kung, A.L., and Livingston, D.M. (1999). Functional role of p35srj, a novel p300/CBP binding protein, during transactivation by HIF-1. *Genes Dev.* *13*, 64–75.
- Campeau, E., Ruhl, V.E., Rodier, F., Smith, C.L., Rahmberg, B.L., Fuss, J.O., Campisi, J., Yaswen, P., Cooper, P.K., and Kaufman, P.D. (2009). A versatile viral system for expression and depletion of proteins in mammalian cells. *PLoS One* *4*, e6529.
- Dimitriev, P. V., and Vassetzky, Y.S. (2008). A set of vectors for introduction of antibiotic resistance genes by in vitro Cre-mediated recombination. *BMC Res. Notes* *1*, 135.
- Guasti, L., Prasongchean, W., Klefthouris, G., Mukherjee, S., Thrasher, A.J., Bulstrode, N.W., and Ferretti, P. (2012). High plasticity of pediatric adipose tissue-derived stem cells: too much for selective skeletogenic differentiation? *Stem Cells Transl. Med.* *1*, 384–395.
- Ichida, M., Nemoto, S., and Finkel, T. (2002). Identification of a specific molecular repressor of the

peroxisome proliferator-activated receptor gamma Coactivator-1 alpha (PGC-1alpha). *J. Biol. Chem.* 277, 50991–50995.

Jeanneteau, F., Garabedian, M.J., and Chao, M. V (2008). Activation of Trk neurotrophin receptors by glucocorticoids provides a neuroprotective effect. *Proc. Natl. Acad. Sci. U. S. A.* 105, 4862–4867.

Joberty, G., Petersen, C., Gao, L., and Macara, I.G. (2000). The cell-polarity protein Par6 links Par3 and atypical protein kinase C to Cdc42. *Nat. Cell Biol.* 2, 531–539.

Livak, K.J., and Schmittgen, T.D. (2001). Analysis of Relative Gene Expression Data Using Real-Time Quantitative PCR and the  $2^{-\Delta\Delta CT}$  Method. *Methods* 25, 402–408.

Martin-Ramirez, J., Hofman, M., van den Biggelaar, M., Hebbel, R.P., and Voorberg, J. (2012). Establishment of outgrowth endothelial cells from peripheral blood. *Nat. Protoc.* 7, 1709–1715.

Poliandri, A., Miller, D., Howard, S., Nobles, M., Ruiz-Babot, G., Harmer, S., Tinker, A., McKay, T., Guasti, L., and Dunkel, L. (2017). Generation of kisspeptin-responsive GnRH neurons from human pluripotent stem cells. *Mol. Cell. Endocrinol.* 447, 12–22.

Rodríguez-Asiain, A., Ruiz-Babot, G., Romero, W., Cubí, R., Erazo, T., Biondi, R.M., Bayascas, J.R., Aguilera, J., Gómez, N., Gil, C., et al. (2011). Brain Specific Kinase-1 BRSK1/SAD-B associates with lipid rafts: modulation of kinase activity by lipid environment. *Biochim. Biophys. Acta - Mol. Cell Biol. Lipids* 1811, 1124–1135.

Schweitzer, K.M., Vicart, P., Delouis, C., Paulin, D., Dräger, A.M., Langenhuijsen, M.M., and Weksler, B.B. (1997). Characterization of a newly established human bone marrow endothelial cell line: distinct adhesive properties for hematopoietic progenitors compared with human umbilical vein endothelial cells. *Lab. Invest.* 76, 25–36.

Solito, E., Romero, I.A., Marullo, S., Russo-Marie, F., and Weksler, B.B. (2000). Annexin 1 Binds to U937 Monocytic Cells and Inhibits Their Adhesion to Microvascular Endothelium: Involvement of the  $\alpha 4\beta 1$  Integrin. *J. Immunol.* 165.

Welm, B.E., Dijkgraaf, G.J.P., Bledau, A.S., Welm, A.L., and Werb, Z. (2008). Lentiviral Transduction of Mammary Stem Cells for Analysis of Gene Function during Development and Cancer. *Cell Stem Cell* 2, 90–102.
